# Supplementary material for: Host-Associated Bacterial Succession during the Early Embryonic Stages and First Feeding in Farmed Gilthead Sea Bream (Sparus aurata)
Source: PubMed Central journal article supplement (PMC6678923; doi:10.3390/genes10070483), 2019-06-26
Supplement: genes-10-00483-s001.pdf [file genes-10-00483-s001.pdf]

# Host-Associated Bacterial Succession during the Early Embryonic Stages and First Feeding in Farmed Gilthead Sea Bream (*Sparus aurata*)

Eleni Nikouli <sup>1</sup>, Alexandra Meziti <sup>1</sup>, Efthimia Antonopoulou <sup>2</sup>, Eleni Mente <sup>1</sup> and Konstantinos Ar. Kormas <sup>1,\*</sup>

<sup>1</sup> Department of Ichthyology and Aquatic Environment, School of Agricultural Sciences, University of Thessaly, Volos 384 46, Greece; EN: [elnikoul@uth.gr](mailto:elnikoul@uth.gr); AM: [ameziti@gmail.com](mailto:ameziti@gmail.com); EM: [emente@uth.gr](mailto:emente@uth.gr)

<sup>2</sup> Laboratory of Animal Physiology, Department of Zoology, School of Biology, Aristotle University of Thessaloniki, 541 24, Greece; [eantono@bio.auth.gr](mailto:eantono@bio.auth.gr)

\* Correspondence: [kkormas@uth.gr](mailto:kkormas@uth.gr), [kkormas@gmail.com](mailto:kkormas@gmail.com); Tel.: +30-242-109-3082

**Supplementary material**

**Table S1.** Individual sequence reads of the investigated developmental stages of *Sparus aurata* larvae. OTU: operational taxonomic unit; D: day; a, b, c: replicate sample.

|          | D0a | D0b  | D0c |          | D5a  | D5b  |          | D15a | D15b | D15c |          | D21a | D21b | D21c |          | D71a | D71b |
|----------|-----|------|-----|----------|------|------|----------|------|------|------|----------|------|------|------|----------|------|------|
| OTU_26   | 586 | 1082 | 147 | OTU_7    | 1959 | 2023 | OTU_6    | 554  | 1398 | 457  | OTU_6    | 55   | 415  | 42   | OTU_25   | 14   | 151  |
| OTU_11   | 943 | 241  | 84  | OTU_12   | 1903 | 774  | OTU_42   | 64   | 340  | 42   | OTU_9    | 78   | 137  | 72   | OTU_101  | 27   | 111  |
| OTU_24   | 53  | 182  | 778 | OTU_11   | 99   | 2025 | OTU_89   | 173  | 212  | 61   | OTU_5    | 140  | 85   | 48   | OTU_94   | 14   | 99   |
| OTU_32   | 6   | 30   | 892 | OTU_532  | 103  | 503  | OTU_156  | 54   | 261  | 29   | OTU_1913 | 14   | 36   | 104  | OTU_355  | 75   | 27   |
| OTU_47   | 0   | 11   | 617 | OTU_942  | 301  | 272  | OTU_97   | 299  | 41   | 0    | OTU_89   | 13   | 109  | 9    | OTU_20   | 73   | 25   |
| OTU_52   | 15  | 26   | 314 | OTU_58   | 101  | 452  | OTU_56   | 58   | 59   | 159  | OTU_66   | 38   | 23   | 40   | OTU_1616 | 47   | 9    |
| OTU_113  | 8   | 18   | 301 | OTU_354  | 255  | 261  | OTU_737  | 113  | 117  | 20   | OTU_194  | 15   | 1    | 78   | OTU_168  | 0    | 53   |
| OTU_152  | 0   | 8    | 258 | OTU_1089 | 116  | 110  | OTU_66   | 81   | 95   | 56   | OTU_57   | 6    | 54   | 25   | OTU_263  | 0    | 53   |
| OTU_20   | 30  | 208  | 20  | OTU_121  | 163  | 3    | OTU_40   | 0    | 216  | 0    | OTU_122  | 35   | 15   | 22   | OTU_87   | 8    | 44   |
| OTU_12   | 10  | 180  | 27  | OTU_23   | 46   | 100  | OTU_1913 | 142  | 51   | 21   | OTU_37   | 13   | 39   | 16   | OTU_436  | 40   | 10   |
| OTU_23   | 13  | 189  | 4   | OTU_1794 | 75   | 69   | OTU_493  | 78   | 110  | 15   | OTU_60   | 5    | 21   | 24   | OTU_179  | 0    | 44   |
| OTU_82   | 19  | 178  | 1   | OTU_944  | 109  | 23   | OTU_43   | 59   | 79   | 7    | OTU_46   | 8    | 27   | 14   | OTU_5    | 6    | 37   |
| OTU_10   | 47  | 115  | 23  | OTU_1561 | 67   | 60   | OTU_172  | 11   | 86   | 18   | OTU_108  | 2    | 10   | 30   | OTU_212  | 17   | 24   |
| OTU_214  | 4   | 159  | 13  | OTU_191  | 64   | 57   | OTU_1821 | 43   | 65   | 6    | OTU_42   | 3    | 23   | 9    | OTU_945  | 25   | 15   |
| OTU_104  | 0   | 0    | 154 | OTU_193  | 58   | 51   | OTU_60   | 13   | 78   | 12   | OTU_1215 | 7    | 26   | 1    | OTU_240  | 0    | 39   |
| OTU_110  | 0   | 0    | 147 | OTU_331  | 63   | 41   | OTU_63   | 41   | 49   | 2    | OTU_67   | 1    | 9    | 23   | OTU_29   | 1    | 37   |
| OTU_109  | 0   | 2    | 143 | OTU_524  | 8    | 81   | OTU_326  | 43   | 5    | 35   | OTU_26   | 4    | 19   | 6    | OTU_218  | 0    | 38   |
| OTU_356  | 44  | 84   | 10  | OTU_1552 | 35   | 48   | OTU_57   | 44   | 4    | 34   | OTU_172  | 8    | 10   | 11   | OTU_403  | 0    | 37   |
| OTU_123  | 12  | 20   | 95  | OTU_82   | 40   | 38   | OTU_382  | 35   | 42   | 1    | OTU_54   | 9    | 8    | 9    | OTU_53   | 23   | 13   |
| OTU_90   | 8   | 74   | 37  | OTU_1341 | 13   | 61   | OTU_277  | 10   | 54   | 10   | OTU_10   | 7    | 8    | 10   | OTU_35   | 0    | 34   |
| OTU_120  | 0   | 0    | 119 | OTU_665  | 10   | 63   | OTU_1215 | 2    | 46   | 25   | OTU_1632 | 4    | 8    | 13   | OTU_136  | 11   | 23   |
| OTU_300  | 3   | 2    | 114 | OTU_847  | 27   | 46   | OTU_26   | 28   | 40   | 3    | OTU_592  | 0    | 19   | 4    | OTU_298  | 0    | 34   |
| OTU_1437 | 32  | 76   | 10  | OTU_413  | 29   | 42   | OTU_22   | 2    | 60   | 0    | OTU_1820 | 0    | 22   | 0    | OTU_1738 | 30   | 3    |
| OTU_140  | 4   | 50   | 54  | OTU_773  | 27   | 44   | OTU_1008 | 29   | 9    | 23   | OTU_213  | 1    | 20   | 0    | OTU_334  | 32   | 0    |
| OTU_223  | 29  | 76   | 3   | OTU_1867 | 36   | 32   | OTU_1699 | 16   | 19   | 17   | OTU_277  | 0    | 4    | 17   | OTU_65   | 0    | 30   |
| OTU_1848 | 0   | 2    | 102 | OTU_443  | 37   | 29   | OTU_407  | 34   | 15   | 2    | OTU_22   | 3    | 4    | 13   | OTU_4    | 11   | 17   |

|          |    |    |    |          |    |    |          |    |    |    |          |    |    |    |          |    |    |
|----------|----|----|----|----------|----|----|----------|----|----|----|----------|----|----|----|----------|----|----|
| OTU_18   | 78 | 6  | 7  | OTU_688  | 2  | 39 | OTU_4    | 8  | 34 | 7  | OTU_40   | 7  | 6  | 7  | OTU_129  | 8  | 20 |
| OTU_147  | 0  | 0  | 90 | OTU_597  | 39 | 0  | OTU_652  | 19 | 26 | 4  | OTU_407  | 5  | 9  | 6  | OTU_341  | 0  | 26 |
| OTU_125  | 33 | 6  | 49 | OTU_61   | 16 | 17 | OTU_872  | 27 | 16 | 4  | OTU_69   | 0  | 13 | 6  | OTU_148  | 3  | 22 |
| OTU_592  | 3  | 3  | 80 | OTU_1474 | 14 | 19 | OTU_5    | 12 | 9  | 24 | OTU_41   | 1  | 8  | 8  | OTU_353  | 0  | 25 |
| OTU_149  | 0  | 5  | 75 | OTU_1563 | 5  | 28 | OTU_1478 | 16 | 23 | 2  | OTU_106  | 9  | 3  | 5  | OTU_128  | 0  | 23 |
| OTU_146  | 5  | 52 | 13 | OTU_10   | 16 | 13 | OTU_54   | 12 | 16 | 9  | OTU_1319 | 2  | 6  | 9  | OTU_392  | 0  | 23 |
| OTU_162  | 27 | 39 | 2  | OTU_142  | 25 | 1  | OTU_194  | 1  | 35 | 1  | OTU_23   | 0  | 16 | 0  | OTU_6    | 22 | 0  |
| OTU_4    | 3  | 62 | 0  | OTU_1033 | 2  | 20 | OTU_131  | 18 | 17 | 1  | OTU_156  | 6  | 9  | 1  | OTU_266  | 0  | 22 |
| OTU_208  | 0  | 0  | 63 | OTU_59   | 20 | 0  | OTU_129  | 4  | 25 | 6  | OTU_1809 | 0  | 16 | 0  | OTU_1506 | 2  | 20 |
| OTU_246  | 0  | 0  | 63 | OTU_1808 | 5  | 14 | OTU_554  | 6  | 28 | 0  | OTU_56   | 6  | 1  | 8  | OTU_1632 | 22 | 0  |
| OTU_50   | 55 | 5  | 2  | OTU_994  | 14 | 4  | OTU_612  | 11 | 22 | 1  | OTU_1145 | 4  | 0  | 11 | OTU_476  | 15 | 6  |
| OTU_281  | 4  | 53 | 0  | OTU_207  | 9  | 8  | OTU_1809 | 6  | 26 | 2  | OTU_197  | 0  | 14 | 0  | OTU_1870 | 21 | 0  |
| OTU_129  | 1  | 52 | 0  | OTU_1658 | 7  | 10 | OTU_1319 | 28 | 0  | 4  | OTU_236  | 0  | 1  | 13 | OTU_21   | 1  | 19 |
| OTU_190  | 23 | 25 | 4  | OTU_1421 | 5  | 10 | OTU_281  | 1  | 26 | 4  | OTU_1870 | 11 | 0  | 3  | OTU_281  | 5  | 15 |
| OTU_227  | 0  | 4  | 44 | OTU_229  | 14 | 0  | OTU_1051 | 23 | 6  | 1  | OTU_43   | 2  | 8  | 3  | OTU_460  | 0  | 17 |
| OTU_374  | 0  | 0  | 47 | OTU_2    | 11 | 2  | OTU_1322 | 13 | 9  | 7  | OTU_1887 | 1  | 10 | 2  | OTU_10   | 0  | 16 |
| OTU_432  | 11 | 12 | 23 | OTU_312  | 7  | 6  | OTU_1145 | 19 | 7  | 0  | OTU_586  | 0  | 1  | 11 | OTU_239  | 15 | 1  |
| OTU_1730 | 0  | 1  | 44 | OTU_1576 | 0  | 12 | OTU_82   | 11 | 4  | 10 | OTU_1774 | 0  | 6  | 6  | OTU_470  | 15 | 1  |
| OTU_524  | 26 | 11 | 7  | OTU_107  | 8  | 3  | OTU_184  | 15 | 8  | 2  | OTU_554  | 0  | 1  | 10 | OTU_481  | 0  | 16 |
| OTU_278  | 0  | 0  | 42 | OTU_346  | 11 | 0  | OTU_248  | 4  | 7  | 14 | OTU_836  | 2  | 7  | 2  | OTU_1725 | 10 | 6  |
| OTU_473  | 0  | 9  | 32 | OTU_922  | 6  | 5  | OTU_342  | 18 | 5  | 2  | OTU_24   | 8  | 2  | 0  | OTU_41   | 0  | 15 |
| OTU_256  | 0  | 0  | 40 | OTU_1179 | 0  | 11 | OTU_1462 | 3  | 17 | 5  | OTU_180  | 1  | 1  | 8  | OTU_202  | 15 | 0  |
| OTU_6    | 0  | 24 | 15 | OTU_451  | 9  | 1  | OTU_1747 | 21 | 4  | 0  | OTU_604  | 0  | 6  | 4  | OTU_431  | 0  | 15 |
| OTU_1068 | 0  | 0  | 39 | OTU_500  | 10 | 0  | OTU_364  | 19 | 0  | 5  | OTU_646  | 0  | 2  | 8  | OTU_998  | 6  | 9  |
| OTU_1808 | 3  | 36 | 0  | OTU_1056 | 9  | 0  | OTU_122  | 14 | 4  | 5  | OTU_1534 | 5  | 2  | 3  | OTU_402  | 0  | 14 |
| OTU_232  | 17 | 17 | 3  | OTU_215  | 4  | 4  | OTU_9    | 0  | 10 | 12 | OTU_1852 | 1  | 3  | 6  | OTU_667  | 0  | 14 |
| OTU_51   | 0  | 34 | 0  | OTU_239  | 8  | 0  | OTU_908  | 1  | 21 | 0  | OTU_131  | 6  | 1  | 2  | OTU_682  | 14 | 0  |
| OTU_287  | 0  | 0  | 34 | OTU_264  | 0  | 8  | OTU_1776 | 20 | 1  | 0  | OTU_192  | 1  | 0  | 8  | OTU_426  | 13 | 0  |
| OTU_1145 | 5  | 28 | 1  | OTU_658  | 2  | 6  | OTU_1785 | 2  | 17 | 2  | OTU_250  | 5  | 0  | 4  | OTU_455  | 7  | 6  |
| OTU_69   | 0  | 0  | 33 | OTU_832  | 4  | 4  | OTU_1911 | 3  | 17 | 1  | OTU_261  | 4  | 2  | 3  | OTU_619  | 13 | 0  |

|          |    |    |    |          |   |   |          |    |    |   |          |   |   |   |          |    |    |
|----------|----|----|----|----------|---|---|----------|----|----|---|----------|---|---|---|----------|----|----|
| OTU_420  | 2  | 31 | 0  | OTU_28   | 3 | 4 | OTU_106  | 15 | 3  | 1 | OTU_365  | 0 | 4 | 5 | OTU_84   | 0  | 12 |
| OTU_903  | 0  | 3  | 29 | OTU_1837 | 4 | 3 | OTU_715  | 4  | 14 | 1 | OTU_612  | 0 | 6 | 3 | OTU_114  | 1  | 11 |
| OTU_61   | 0  | 30 | 0  | OTU_22   | 5 | 1 | OTU_753  | 0  | 15 | 4 | OTU_1014 | 1 | 8 | 0 | OTU_177  | 0  | 12 |
| OTU_307  | 0  | 30 | 0  | OTU_44   | 6 | 0 | OTU_1820 | 0  | 18 | 1 | OTU_4    | 0 | 2 | 6 | OTU_181  | 12 | 0  |
| OTU_323  | 0  | 0  | 30 | OTU_1409 | 5 | 1 | OTU_548  | 11 | 3  | 4 | OTU_20   | 0 | 7 | 1 | OTU_258  | 12 | 0  |
| OTU_1275 | 0  | 0  | 30 | OTU_1437 | 3 | 3 | OTU_1380 | 18 | 0  | 0 | OTU_125  | 0 | 8 | 0 | OTU_360  | 8  | 4  |
| OTU_1507 | 0  | 0  | 29 | OTU_1870 | 6 | 0 | OTU_772  | 7  | 9  | 1 | OTU_427  | 1 | 6 | 1 | OTU_390  | 0  | 12 |
| OTU_242  | 0  | 27 | 0  | OTU_225  | 5 | 0 | OTU_64   | 16 | 0  | 0 | OTU_434  | 8 | 0 | 0 | OTU_440  | 12 | 0  |
| OTU_312  | 8  | 18 | 1  | OTU_448  | 0 | 5 | OTU_759  | 10 | 5  | 1 | OTU_485  | 0 | 8 | 0 | OTU_492  | 2  | 10 |
| OTU_351  | 0  | 0  | 27 | OTU_726  | 0 | 5 | OTU_1350 | 0  | 16 | 0 | OTU_493  | 0 | 5 | 3 | OTU_542  | 0  | 12 |
| OTU_688  | 17 | 8  | 1  | OTU_1119 | 3 | 2 | OTU_1522 | 12 | 1  | 3 | OTU_1699 | 0 | 5 | 3 | OTU_611  | 11 | 0  |
| OTU_361  | 0  | 10 | 15 | OTU_1834 | 4 | 1 | OTU_108  | 13 | 0  | 2 | OTU_1895 | 3 | 4 | 1 | OTU_937  | 1  | 10 |
| OTU_944  | 1  | 22 | 2  | OTU_1885 | 0 | 5 | OTU_297  | 3  | 12 | 0 | OTU_15   | 1 | 4 | 2 | OTU_122  | 5  | 5  |
| OTU_1339 | 2  | 1  | 22 | OTU_38   | 3 | 1 | OTU_1632 | 14 | 0  | 1 | OTU_63   | 0 | 0 | 7 | OTU_180  | 10 | 0  |
| OTU_1642 | 0  | 6  | 19 | OTU_218  | 1 | 3 | OTU_94   | 0  | 14 | 0 | OTU_243  | 0 | 5 | 2 | OTU_502  | 10 | 0  |
| OTU_1870 | 2  | 23 | 0  | OTU_574  | 4 | 0 | OTU_626  | 8  | 5  | 1 | OTU_281  | 3 | 0 | 4 | OTU_673  | 0  | 10 |
| OTU_102  | 0  | 7  | 17 | OTU_648  | 3 | 1 | OTU_1287 | 7  | 5  | 1 | OTU_324  | 2 | 3 | 2 | OTU_1799 | 8  | 2  |
| OTU_375  | 0  | 0  | 24 | OTU_1145 | 2 | 2 | OTU_1506 | 6  | 3  | 4 | OTU_424  | 0 | 3 | 4 | OTU_106  | 8  | 1  |
| OTU_391  | 0  | 23 | 0  | OTU_1516 | 4 | 0 | OTU_24   | 12 | 0  | 0 | OTU_759  | 2 | 5 | 0 | OTU_330  | 9  | 0  |
| OTU_415  | 0  | 23 | 0  | OTU_695  | 0 | 3 | OTU_1165 | 6  | 4  | 2 | OTU_1510 | 1 | 2 | 4 | OTU_365  | 9  | 0  |
| OTU_44   | 0  | 14 | 7  | OTU_776  | 2 | 1 | OTU_1255 | 7  | 5  | 0 | OTU_1785 | 0 | 6 | 1 | OTU_702  | 0  | 9  |
| OTU_94   | 6  | 10 | 5  | OTU_1012 | 0 | 3 | OTU_1738 | 3  | 7  | 2 | OTU_1821 | 0 | 7 | 0 | OTU_854  | 0  | 9  |
| OTU_22   | 3  | 14 | 3  | OTU_1303 | 1 | 2 | OTU_359  | 0  | 3  | 8 | OTU_173  | 0 | 0 | 6 | OTU_856  | 0  | 9  |
| OTU_417  | 0  | 0  | 20 | OTU_1448 | 1 | 2 | OTU_20   | 8  | 2  | 0 | OTU_737  | 2 | 3 | 1 | OTU_882  | 9  | 0  |
| OTU_419  | 0  | 10 | 10 | OTU_1614 | 2 | 1 | OTU_631  | 10 | 0  | 0 | OTU_753  | 0 | 6 | 0 | OTU_900  | 0  | 9  |
| OTU_469  | 3  | 1  | 16 | OTU_148  | 2 | 0 | OTU_653  | 0  | 10 | 0 | OTU_829  | 1 | 3 | 2 | OTU_972  | 8  | 1  |
| OTU_1453 | 0  | 12 | 8  | OTU_294  | 0 | 2 | OTU_706  | 10 | 0  | 0 | OTU_1051 | 1 | 4 | 1 | OTU_51   | 0  | 8  |
| OTU_1629 | 0  | 1  | 19 | OTU_444  | 1 | 1 | OTU_1510 | 9  | 0  | 1 | OTU_1104 | 1 | 1 | 4 | OTU_139  | 6  | 2  |
| OTU_101  | 7  | 10 | 2  | OTU_1099 | 1 | 1 | OTU_1712 | 1  | 8  | 1 | OTU_1747 | 1 | 3 | 2 | OTU_229  | 7  | 1  |
| OTU_446  | 0  | 12 | 7  | OTU_1183 | 2 | 0 | OTU_1774 | 0  | 10 | 0 | OTU_51   | 0 | 3 | 2 | OTU_384  | 0  | 8  |

|                 |    |    |    |                 |   |   |                 |   |   |   |                 |   |   |   |                 |   |   |
|-----------------|----|----|----|-----------------|---|---|-----------------|---|---|---|-----------------|---|---|---|-----------------|---|---|
| <i>OTU_550</i>  | 1  | 1  | 17 | <i>OTU_1202</i> | 1 | 1 | <i>OTU_304</i>  | 6 | 0 | 3 | <i>OTU_52</i>   | 2 | 2 | 1 | <i>OTU_1485</i> | 5 | 3 |
| <i>OTU_15</i>   | 0  | 18 | 0  | <i>OTU_1480</i> | 1 | 1 | <i>OTU_10</i>   | 2 | 4 | 2 | <i>OTU_82</i>   | 2 | 3 | 0 | <i>OTU_1916</i> | 8 | 0 |
| <i>OTU_442</i>  | 0  | 5  | 13 | <i>OTU_1581</i> | 2 | 0 | <i>OTU_219</i>  | 8 | 0 | 0 | <i>OTU_118</i>  | 1 | 0 | 4 | <i>OTU_67</i>   | 7 | 0 |
| <i>OTU_512</i>  | 0  | 18 | 0  | <i>OTU_1723</i> | 2 | 0 | <i>OTU_344</i>  | 6 | 2 | 0 | <i>OTU_184</i>  | 1 | 2 | 2 | <i>OTU_324</i>  | 0 | 7 |
| <i>OTU_966</i>  | 0  | 7  | 11 | <i>OTU_1732</i> | 2 | 0 | <i>OTU_454</i>  | 0 | 7 | 1 | <i>OTU_325</i>  | 0 | 4 | 1 | <i>OTU_834</i>  | 7 | 0 |
| <i>OTU_461</i>  | 0  | 0  | 17 | <i>OTU_1805</i> | 0 | 2 | <i>OTU_1155</i> | 2 | 6 | 0 | <i>OTU_336</i>  | 0 | 3 | 2 | <i>OTU_1313</i> | 4 | 3 |
| <i>OTU_471</i>  | 0  | 0  | 17 | <i>OTU_1907</i> | 1 | 1 | <i>OTU_1349</i> | 1 | 5 | 2 | <i>OTU_788</i>  | 0 | 3 | 2 | <i>OTU_1371</i> | 0 | 7 |
| <i>OTU_1217</i> | 1  | 3  | 13 | <i>OTU_9</i>    | 1 | 0 | <i>OTU_1495</i> | 8 | 0 | 0 | <i>OTU_800</i>  | 2 | 2 | 1 | <i>OTU_275</i>  | 0 | 6 |
| <i>OTU_1818</i> | 0  | 0  | 17 | <i>OTU_71</i>   | 1 | 0 | <i>OTU_1616</i> | 5 | 3 | 0 | <i>OTU_939</i>  | 1 | 2 | 2 | <i>OTU_285</i>  | 0 | 6 |
| <i>OTU_188</i>  | 0  | 16 | 0  | <i>OTU_90</i>   | 0 | 1 | <i>OTU_267</i>  | 0 | 0 | 7 | <i>OTU_1484</i> | 2 | 1 | 2 | <i>OTU_312</i>  | 0 | 6 |
| <i>OTU_202</i>  | 2  | 14 | 0  | <i>OTU_144</i>  | 1 | 0 | <i>OTU_838</i>  | 7 | 0 | 0 | <i>OTU_129</i>  | 1 | 0 | 3 | <i>OTU_520</i>  | 2 | 4 |
| <i>OTU_239</i>  | 16 | 0  | 0  | <i>OTU_158</i>  | 0 | 1 | <i>OTU_1480</i> | 2 | 4 | 1 | <i>OTU_202</i>  | 1 | 0 | 3 | <i>OTU_603</i>  | 2 | 4 |
| <i>OTU_421</i>  | 0  | 7  | 9  | <i>OTU_199</i>  | 1 | 0 | <i>OTU_312</i>  | 4 | 0 | 2 | <i>OTU_706</i>  | 0 | 0 | 4 | <i>OTU_881</i>  | 6 | 0 |
| <i>OTU_491</i>  | 0  | 0  | 16 | <i>OTU_206</i>  | 1 | 0 | <i>OTU_340</i>  | 1 | 5 | 0 | <i>OTU_772</i>  | 1 | 3 | 0 | <i>OTU_1645</i> | 0 | 6 |
| <i>OTU_1738</i> | 1  | 15 | 0  | <i>OTU_233</i>  | 0 | 1 | <i>OTU_356</i>  | 4 | 2 | 0 | <i>OTU_842</i>  | 0 | 4 | 0 | <i>OTU_1646</i> | 3 | 3 |
| <i>OTU_108</i>  | 7  | 8  | 0  | <i>OTU_394</i>  | 0 | 1 | <i>OTU_427</i>  | 5 | 1 | 0 | <i>OTU_970</i>  | 1 | 1 | 2 | <i>OTU_1692</i> | 0 | 6 |
| <i>OTU_501</i>  | 0  | 0  | 15 | <i>OTU_452</i>  | 1 | 0 | <i>OTU_1017</i> | 6 | 0 | 0 | <i>OTU_1183</i> | 0 | 0 | 4 | <i>OTU_1882</i> | 1 | 5 |
| <i>OTU_514</i>  | 0  | 15 | 0  | <i>OTU_575</i>  | 1 | 0 | <i>OTU_1260</i> | 5 | 1 | 0 | <i>OTU_1196</i> | 0 | 0 | 4 | <i>OTU_15</i>   | 5 | 0 |
| <i>OTU_756</i>  | 0  | 15 | 0  | <i>OTU_630</i>  | 0 | 1 | <i>OTU_1488</i> | 0 | 6 | 0 | <i>OTU_1478</i> | 1 | 2 | 1 | <i>OTU_16</i>   | 0 | 5 |
| <i>OTU_1861</i> | 0  | 14 | 1  | <i>OTU_807</i>  | 1 | 0 | <i>OTU_1696</i> | 6 | 0 | 0 | <i>OTU_1522</i> | 3 | 0 | 1 | <i>OTU_54</i>   | 3 | 2 |
| <i>OTU_346</i>  | 11 | 3  | 0  | <i>OTU_842</i>  | 0 | 1 | <i>OTU_1887</i> | 3 | 0 | 3 | <i>OTU_1896</i> | 1 | 2 | 1 | <i>OTU_89</i>   | 5 | 0 |
| <i>OTU_554</i>  | 7  | 5  | 2  | <i>OTU_860</i>  | 0 | 1 | <i>OTU_139</i>  | 1 | 3 | 1 | <i>OTU_12</i>   | 0 | 3 | 0 | <i>OTU_225</i>  | 5 | 0 |
| <i>OTU_559</i>  | 4  | 9  | 1  | <i>OTU_1001</i> | 1 | 0 | <i>OTU_148</i>  | 0 | 5 | 0 | <i>OTU_64</i>   | 0 | 3 | 0 | <i>OTU_646</i>  | 5 | 0 |
| <i>OTU_1632</i> | 5  | 7  | 2  | <i>OTU_1062</i> | 1 | 0 | <i>OTU_223</i>  | 2 | 2 | 1 | <i>OTU_73</i>   | 0 | 0 | 3 | <i>OTU_987</i>  | 1 | 4 |
| <i>OTU_43</i>   | 1  | 12 | 0  | <i>OTU_1120</i> | 0 | 1 | <i>OTU_266</i>  | 0 | 5 | 0 | <i>OTU_94</i>   | 3 | 0 | 0 | <i>OTU_1042</i> | 0 | 5 |
| <i>OTU_260</i>  | 0  | 13 | 0  | <i>OTU_1267</i> | 0 | 1 | <i>OTU_484</i>  | 1 | 3 | 1 | <i>OTU_382</i>  | 1 | 1 | 1 | <i>OTU_1145</i> | 0 | 5 |
| <i>OTU_266</i>  | 13 | 0  | 0  | <i>OTU_1280</i> | 0 | 1 | <i>OTU_531</i>  | 1 | 0 | 4 | <i>OTU_467</i>  | 0 | 0 | 3 | <i>OTU_1349</i> | 4 | 1 |
| <i>OTU_505</i>  | 0  | 0  | 13 | <i>OTU_1373</i> | 0 | 1 | <i>OTU_557</i>  | 0 | 4 | 1 | <i>OTU_531</i>  | 0 | 0 | 3 | <i>OTU_1624</i> | 4 | 1 |
| <i>OTU_1033</i> | 10 | 3  | 0  | <i>OTU_1482</i> | 1 | 0 | <i>OTU_788</i>  | 0 | 5 | 0 | <i>OTU_596</i>  | 0 | 2 | 1 | <i>OTU_33</i>   | 0 | 4 |
| <i>OTU_1349</i> | 0  | 13 | 0  | <i>OTU_1545</i> | 0 | 1 | <i>OTU_836</i>  | 3 | 2 | 0 | <i>OTU_621</i>  | 3 | 0 | 0 | <i>OTU_37</i>   | 4 | 0 |

|                 |    |    |    |                 |   |   |                 |   |   |   |                 |   |   |   |                 |   |   |
|-----------------|----|----|----|-----------------|---|---|-----------------|---|---|---|-----------------|---|---|---|-----------------|---|---|
| <i>OTU_1514</i> | 0  | 13 | 0  | <i>OTU_1585</i> | 0 | 1 | <i>OTU_868</i>  | 4 | 1 | 0 | <i>OTU_652</i>  | 0 | 1 | 2 | <i>OTU_297</i>  | 4 | 0 |
| <i>OTU_1907</i> | 1  | 11 | 1  | <i>OTU_1632</i> | 0 | 1 | <i>OTU_1074</i> | 0 | 5 | 0 | <i>OTU_851</i>  | 0 | 3 | 0 | <i>OTU_407</i>  | 2 | 2 |
| <i>OTU_237</i>  | 0  | 11 | 1  | <i>OTU_1742</i> | 0 | 1 | <i>OTU_1412</i> | 0 | 5 | 0 | <i>OTU_908</i>  | 0 | 1 | 2 | <i>OTU_494</i>  | 0 | 4 |
| <i>OTU_304</i>  | 11 | 0  | 1  |                 |   |   | <i>OTU_1892</i> | 1 | 4 | 0 | <i>OTU_1225</i> | 0 | 0 | 3 | <i>OTU_1071</i> | 4 | 0 |
| <i>OTU_605</i>  | 0  | 12 | 0  |                 |   |   | <i>OTU_153</i>  | 1 | 1 | 2 | <i>OTU_1271</i> | 0 | 1 | 2 | <i>OTU_1163</i> | 0 | 4 |
| <i>OTU_614</i>  | 0  | 4  | 8  |                 |   |   | <i>OTU_173</i>  | 0 | 0 | 4 | <i>OTU_1291</i> | 0 | 3 | 0 | <i>OTU_1267</i> | 0 | 4 |
| <i>OTU_615</i>  | 0  | 0  | 12 |                 |   |   | <i>OTU_186</i>  | 0 | 4 | 0 | <i>OTU_1361</i> | 1 | 2 | 0 | <i>OTU_1270</i> | 4 | 0 |
| <i>OTU_693</i>  | 0  | 0  | 12 |                 |   |   | <i>OTU_225</i>  | 0 | 4 | 0 | <i>OTU_1411</i> | 3 | 0 | 0 | <i>OTU_1325</i> | 4 | 0 |
| <i>OTU_705</i>  | 0  | 0  | 12 |                 |   |   | <i>OTU_239</i>  | 0 | 1 | 3 | <i>OTU_1462</i> | 1 | 2 | 0 | <i>OTU_1724</i> | 4 | 0 |
| <i>OTU_1614</i> | 4  | 8  | 0  |                 |   |   | <i>OTU_320</i>  | 0 | 4 | 0 | <i>OTU_1480</i> | 1 | 0 | 2 | <i>OTU_205</i>  | 3 | 0 |
| <i>OTU_64</i>   | 0  | 11 | 0  |                 |   |   | <i>OTU_560</i>  | 0 | 4 | 0 | <i>OTU_1670</i> | 0 | 1 | 2 | <i>OTU_336</i>  | 3 | 0 |
| <i>OTU_330</i>  | 0  | 11 | 0  |                 |   |   | <i>OTU_595</i>  | 2 | 2 | 0 | <i>OTU_1892</i> | 0 | 3 | 0 | <i>OTU_453</i>  | 0 | 3 |
| <i>OTU_390</i>  | 0  | 0  | 11 |                 |   |   | <i>OTU_823</i>  | 1 | 2 | 1 | <i>OTU_186</i>  | 0 | 1 | 1 | <i>OTU_838</i>  | 3 | 0 |
| <i>OTU_448</i>  | 3  | 2  | 6  |                 |   |   | <i>OTU_881</i>  | 2 | 2 | 0 | <i>OTU_233</i>  | 0 | 1 | 1 | <i>OTU_855</i>  | 3 | 0 |
| <i>OTU_618</i>  | 0  | 0  | 11 |                 |   |   | <i>OTU_1440</i> | 2 | 2 | 0 | <i>OTU_263</i>  | 1 | 0 | 1 | <i>OTU_902</i>  | 3 | 0 |
| <i>OTU_624</i>  | 0  | 0  | 11 |                 |   |   | <i>OTU_1771</i> | 0 | 4 | 0 | <i>OTU_312</i>  | 2 | 0 | 0 | <i>OTU_1143</i> | 0 | 3 |
| <i>OTU_685</i>  | 0  | 0  | 11 |                 |   |   | <i>OTU_1852</i> | 3 | 0 | 1 | <i>OTU_330</i>  | 1 | 0 | 1 | <i>OTU_1177</i> | 0 | 3 |
| <i>OTU_718</i>  | 0  | 9  | 2  |                 |   |   | <i>OTU_1898</i> | 4 | 0 | 0 | <i>OTU_416</i>  | 1 | 0 | 1 | <i>OTU_1309</i> | 0 | 3 |
| <i>OTU_766</i>  | 2  | 8  | 1  |                 |   |   | <i>OTU_16</i>   | 2 | 1 | 0 | <i>OTU_476</i>  | 0 | 0 | 2 | <i>OTU_1315</i> | 3 | 0 |
| <i>OTU_1485</i> | 0  | 11 | 0  |                 |   |   | <i>OTU_17</i>   | 0 | 0 | 3 | <i>OTU_523</i>  | 0 | 0 | 2 | <i>OTU_1382</i> | 0 | 3 |
| <i>OTU_98</i>   | 6  | 0  | 4  |                 |   |   | <i>OTU_45</i>   | 0 | 3 | 0 | <i>OTU_557</i>  | 0 | 2 | 0 | <i>OTU_1480</i> | 2 | 1 |
| <i>OTU_148</i>  | 1  | 1  | 8  |                 |   |   | <i>OTU_71</i>   | 0 | 3 | 0 | <i>OTU_560</i>  | 0 | 0 | 2 | <i>OTU_1484</i> | 3 | 0 |
| <i>OTU_360</i>  | 10 | 0  | 0  |                 |   |   | <i>OTU_233</i>  | 2 | 1 | 0 | <i>OTU_606</i>  | 1 | 1 | 0 | <i>OTU_1522</i> | 1 | 2 |
| <i>OTU_369</i>  | 2  | 8  | 0  |                 |   |   | <i>OTU_254</i>  | 3 | 0 | 0 | <i>OTU_626</i>  | 0 | 2 | 0 | <i>OTU_1756</i> | 0 | 3 |
| <i>OTU_467</i>  | 0  | 7  | 3  |                 |   |   | <i>OTU_272</i>  | 1 | 2 | 0 | <i>OTU_631</i>  | 1 | 1 | 0 | <i>OTU_1798</i> | 0 | 3 |
| <i>OTU_661</i>  | 0  | 0  | 10 |                 |   |   | <i>OTU_329</i>  | 0 | 3 | 0 | <i>OTU_790</i>  | 0 | 2 | 0 | <i>OTU_1830</i> | 0 | 3 |
| <i>OTU_669</i>  | 10 | 0  | 0  |                 |   |   | <i>OTU_503</i>  | 3 | 0 | 0 | <i>OTU_823</i>  | 0 | 2 | 0 | <i>OTU_77</i>   | 2 | 0 |
| <i>OTU_687</i>  | 0  | 10 | 0  |                 |   |   | <i>OTU_592</i>  | 2 | 0 | 1 | <i>OTU_867</i>  | 0 | 2 | 0 | <i>OTU_130</i>  | 0 | 2 |
| <i>OTU_1109</i> | 0  | 2  | 8  |                 |   |   | <i>OTU_650</i>  | 0 | 3 | 0 | <i>OTU_872</i>  | 1 | 1 | 0 | <i>OTU_184</i>  | 2 | 0 |
| <i>OTU_1228</i> | 0  | 10 | 0  |                 |   |   | <i>OTU_860</i>  | 0 | 3 | 0 | <i>OTU_880</i>  | 0 | 2 | 0 | <i>OTU_268</i>  | 2 | 0 |

|          |   |   |   |  |  |  |          |   |   |   |          |   |   |   |          |   |   |
|----------|---|---|---|--|--|--|----------|---|---|---|----------|---|---|---|----------|---|---|
| OTU_41   | 0 | 9 | 0 |  |  |  | OTU_867  | 0 | 1 | 2 | OTU_1150 | 0 | 1 | 1 | OTU_412  | 0 | 2 |
| OTU_229  | 5 | 1 | 3 |  |  |  | OTU_1029 | 3 | 0 | 0 | OTU_1174 | 1 | 1 | 0 | OTU_424  | 2 | 0 |
| OTU_483  | 0 | 0 | 9 |  |  |  | OTU_1104 | 2 | 1 | 0 | OTU_1220 | 1 | 1 | 0 | OTU_462  | 2 | 0 |
| OTU_585  | 0 | 9 | 0 |  |  |  | OTU_1315 | 2 | 0 | 1 | OTU_1275 | 0 | 1 | 1 | OTU_668  | 2 | 0 |
| OTU_589  | 0 | 0 | 9 |  |  |  | OTU_1437 | 2 | 0 | 1 | OTU_1298 | 0 | 0 | 2 | OTU_766  | 0 | 2 |
| OTU_720  | 0 | 0 | 9 |  |  |  | OTU_1449 | 3 | 0 | 0 | OTU_1313 | 2 | 0 | 0 | OTU_790  | 0 | 2 |
| OTU_722  | 0 | 1 | 8 |  |  |  | OTU_1465 | 1 | 1 | 1 | OTU_1315 | 0 | 0 | 2 | OTU_836  | 1 | 1 |
| OTU_806  | 0 | 0 | 9 |  |  |  | OTU_1485 | 0 | 2 | 1 | OTU_1322 | 2 | 0 | 0 | OTU_975  | 0 | 2 |
| OTU_902  | 0 | 9 | 0 |  |  |  | OTU_1534 | 0 | 0 | 3 | OTU_1350 | 0 | 0 | 2 | OTU_1137 | 2 | 0 |
| OTU_1089 | 0 | 8 | 1 |  |  |  | OTU_1565 | 0 | 3 | 0 | OTU_1386 | 0 | 0 | 2 | OTU_1228 | 1 | 1 |
| OTU_1576 | 8 | 1 | 0 |  |  |  | OTU_1601 | 3 | 0 | 0 | OTU_1430 | 0 | 0 | 2 | OTU_1289 | 0 | 2 |
| OTU_1804 | 0 | 1 | 8 |  |  |  | OTU_1870 | 1 | 1 | 1 | OTU_1437 | 1 | 0 | 1 | OTU_1376 | 2 | 0 |
| OTU_5    | 0 | 8 | 0 |  |  |  | OTU_23   | 2 | 0 | 0 | OTU_1440 | 0 | 0 | 2 | OTU_1392 | 2 | 0 |
| OTU_42   | 2 | 6 | 0 |  |  |  | OTU_37   | 2 | 0 | 0 | OTU_1582 | 0 | 1 | 1 | OTU_1394 | 1 | 1 |
| OTU_180  | 0 | 8 | 0 |  |  |  | OTU_101  | 0 | 0 | 2 | OTU_1624 | 0 | 0 | 2 | OTU_1437 | 1 | 1 |
| OTU_294  | 8 | 0 | 0 |  |  |  | OTU_141  | 0 | 0 | 2 | OTU_1720 | 0 | 2 | 0 | OTU_1453 | 0 | 2 |
| OTU_474  | 0 | 8 | 0 |  |  |  | OTU_146  | 2 | 0 | 0 | OTU_1727 | 0 | 0 | 2 | OTU_1565 | 2 | 0 |
| OTU_519  | 0 | 8 | 0 |  |  |  | OTU_258  | 0 | 2 | 0 | OTU_1801 | 1 | 1 | 0 | OTU_1762 | 1 | 1 |
| OTU_698  | 0 | 0 | 8 |  |  |  | OTU_289  | 1 | 0 | 1 | OTU_1808 | 0 | 1 | 1 | OTU_1852 | 2 | 0 |
| OTU_775  | 0 | 8 | 0 |  |  |  | OTU_318  | 0 | 2 | 0 | OTU_8    | 1 | 0 | 0 | OTU_1898 | 2 | 0 |
| OTU_789  | 5 | 2 | 1 |  |  |  | OTU_321  | 1 | 1 | 0 | OTU_21   | 1 | 0 | 0 | OTU_1907 | 1 | 1 |
| OTU_842  | 0 | 1 | 7 |  |  |  | OTU_325  | 1 | 1 | 0 | OTU_58   | 0 | 1 | 0 | OTU_69   | 0 | 1 |
| OTU_970  | 0 | 7 | 1 |  |  |  | OTU_336  | 2 | 0 | 0 | OTU_71   | 0 | 1 | 0 | OTU_82   | 0 | 1 |
| OTU_1015 | 0 | 3 | 5 |  |  |  | OTU_416  | 0 | 2 | 0 | OTU_92   | 0 | 0 | 1 | OTU_146  | 0 | 1 |
| OTU_1114 | 3 | 2 | 3 |  |  |  | OTU_521  | 2 | 0 | 0 | OTU_93   | 0 | 1 | 0 | OTU_272  | 0 | 1 |
| OTU_1122 | 0 | 0 | 8 |  |  |  | OTU_576  | 2 | 0 | 0 | OTU_97   | 0 | 1 | 0 | OTU_321  | 1 | 0 |
| OTU_1127 | 0 | 7 | 1 |  |  |  | OTU_587  | 0 | 0 | 2 | OTU_101  | 0 | 0 | 1 | OTU_329  | 1 | 0 |
| OTU_1179 | 5 | 3 | 0 |  |  |  | OTU_600  | 2 | 0 | 0 | OTU_102  | 1 | 0 | 0 | OTU_378  | 0 | 1 |
| OTU_1267 | 3 | 5 | 0 |  |  |  | OTU_709  | 0 | 2 | 0 | OTU_113  | 1 | 0 | 0 | OTU_454  | 0 | 1 |
| OTU_1480 | 0 | 8 | 0 |  |  |  | OTU_744  | 0 | 1 | 1 | OTU_134  | 0 | 0 | 1 | OTU_478  | 1 | 0 |

|                 |   |   |   |  |  |  |                 |   |   |   |                |   |   |   |                 |   |   |
|-----------------|---|---|---|--|--|--|-----------------|---|---|---|----------------|---|---|---|-----------------|---|---|
| <i>OTU_121</i>  | 0 | 7 | 0 |  |  |  | <i>OTU_770</i>  | 0 | 2 | 0 | <i>OTU_148</i> | 0 | 1 | 0 | <i>OTU_488</i>  | 0 | 1 |
| <i>OTU_609</i>  | 0 | 0 | 7 |  |  |  | <i>OTU_805</i>  | 2 | 0 | 0 | <i>OTU_153</i> | 0 | 0 | 1 | <i>OTU_517</i>  | 0 | 1 |
| <i>OTU_611</i>  | 0 | 7 | 0 |  |  |  | <i>OTU_813</i>  | 0 | 2 | 0 | <i>OTU_165</i> | 0 | 0 | 1 | <i>OTU_530</i>  | 1 | 0 |
| <i>OTU_796</i>  | 0 | 7 | 0 |  |  |  | <i>OTU_829</i>  | 0 | 0 | 2 | <i>OTU_207</i> | 0 | 0 | 1 | <i>OTU_595</i>  | 0 | 1 |
| <i>OTU_816</i>  | 0 | 7 | 0 |  |  |  | <i>OTU_953</i>  | 2 | 0 | 0 | <i>OTU_209</i> | 1 | 0 | 0 | <i>OTU_596</i>  | 0 | 1 |
| <i>OTU_826</i>  | 0 | 7 | 0 |  |  |  | <i>OTU_985</i>  | 1 | 1 | 0 | <i>OTU_212</i> | 1 | 0 | 0 | <i>OTU_626</i>  | 1 | 0 |
| <i>OTU_907</i>  | 0 | 0 | 7 |  |  |  | <i>OTU_1080</i> | 0 | 2 | 0 | <i>OTU_247</i> | 0 | 0 | 1 | <i>OTU_641</i>  | 0 | 1 |
| <i>OTU_1077</i> | 0 | 1 | 6 |  |  |  | <i>OTU_1193</i> | 2 | 0 | 0 | <i>OTU_266</i> | 1 | 0 | 0 | <i>OTU_706</i>  | 1 | 0 |
| <i>OTU_1617</i> | 0 | 0 | 7 |  |  |  | <i>OTU_1285</i> | 2 | 0 | 0 | <i>OTU_300</i> | 0 | 0 | 1 | <i>OTU_751</i>  | 0 | 1 |
| <i>OTU_33</i>   | 0 | 6 | 0 |  |  |  | <i>OTU_1291</i> | 2 | 0 | 0 | <i>OTU_326</i> | 0 | 1 | 0 | <i>OTU_757</i>  | 0 | 1 |
| <i>OTU_40</i>   | 0 | 6 | 0 |  |  |  | <i>OTU_1466</i> | 1 | 1 | 0 | <i>OTU_356</i> | 0 | 0 | 1 | <i>OTU_764</i>  | 0 | 1 |
| <i>OTU_114</i>  | 1 | 5 | 0 |  |  |  | <i>OTU_1500</i> | 2 | 0 | 0 | <i>OTU_369</i> | 0 | 0 | 1 | <i>OTU_772</i>  | 1 | 0 |
| <i>OTU_130</i>  | 0 | 0 | 6 |  |  |  | <i>OTU_1513</i> | 1 | 1 | 0 | <i>OTU_436</i> | 1 | 0 | 0 | <i>OTU_787</i>  | 1 | 0 |
| <i>OTU_225</i>  | 0 | 6 | 0 |  |  |  | <i>OTU_1524</i> | 0 | 2 | 0 | <i>OTU_478</i> | 0 | 1 | 0 | <i>OTU_793</i>  | 1 | 0 |
| <i>OTU_263</i>  | 3 | 1 | 2 |  |  |  | <i>OTU_1536</i> | 0 | 1 | 1 | <i>OTU_500</i> | 0 | 0 | 1 | <i>OTU_914</i>  | 1 | 0 |
| <i>OTU_384</i>  | 1 | 4 | 1 |  |  |  | <i>OTU_1548</i> | 1 | 1 | 0 | <i>OTU_503</i> | 0 | 0 | 1 | <i>OTU_934</i>  | 1 | 0 |
| <i>OTU_402</i>  | 0 | 6 | 0 |  |  |  | <i>OTU_1645</i> | 2 | 0 | 0 | <i>OTU_510</i> | 0 | 0 | 1 | <i>OTU_962</i>  | 0 | 1 |
| <i>OTU_438</i>  | 0 | 6 | 0 |  |  |  | <i>OTU_1735</i> | 1 | 1 | 0 | <i>OTU_535</i> | 0 | 0 | 1 | <i>OTU_1044</i> | 1 | 0 |
| <i>OTU_476</i>  | 0 | 0 | 6 |  |  |  | <i>OTU_1757</i> | 1 | 0 | 1 | <i>OTU_542</i> | 0 | 0 | 1 | <i>OTU_1062</i> | 0 | 1 |
| <i>OTU_557</i>  | 0 | 6 | 0 |  |  |  | <i>OTU_1801</i> | 0 | 1 | 1 | <i>OTU_548</i> | 0 | 1 | 0 | <i>OTU_1096</i> | 1 | 0 |
| <i>OTU_699</i>  | 0 | 3 | 3 |  |  |  | <i>OTU_1808</i> | 2 | 0 | 0 | <i>OTU_550</i> | 1 | 0 | 0 | <i>OTU_1104</i> | 1 | 0 |
| <i>OTU_938</i>  | 0 | 0 | 6 |  |  |  | <i>OTU_1837</i> | 2 | 0 | 0 | <i>OTU_595</i> | 0 | 1 | 0 | <i>OTU_1131</i> | 1 | 0 |
| <i>OTU_964</i>  | 0 | 6 | 0 |  |  |  | <i>OTU_1896</i> | 1 | 1 | 0 | <i>OTU_635</i> | 0 | 0 | 1 | <i>OTU_1183</i> | 0 | 1 |
| <i>OTU_982</i>  | 2 | 4 | 0 |  |  |  | <i>OTU_2</i>    | 0 | 0 | 1 | <i>OTU_650</i> | 0 | 0 | 1 | <i>OTU_1226</i> | 1 | 0 |
| <i>OTU_1016</i> | 0 | 0 | 6 |  |  |  | <i>OTU_7</i>    | 0 | 1 | 0 | <i>OTU_718</i> | 0 | 1 | 0 | <i>OTU_1255</i> | 1 | 0 |
| <i>OTU_1028</i> | 6 | 0 | 0 |  |  |  | <i>OTU_8</i>    | 1 | 0 | 0 | <i>OTU_722</i> | 0 | 1 | 0 | <i>OTU_1275</i> | 1 | 0 |
| <i>OTU_1043</i> | 0 | 0 | 6 |  |  |  | <i>OTU_11</i>   | 0 | 1 | 0 | <i>OTU_744</i> | 1 | 0 | 0 | <i>OTU_1337</i> | 0 | 1 |
| <i>OTU_1064</i> | 0 | 0 | 6 |  |  |  | <i>OTU_28</i>   | 0 | 0 | 1 | <i>OTU_763</i> | 1 | 0 | 0 | <i>OTU_1342</i> | 1 | 0 |
| <i>OTU_1175</i> | 0 | 0 | 6 |  |  |  | <i>OTU_35</i>   | 0 | 0 | 1 | <i>OTU_785</i> | 0 | 1 | 0 | <i>OTU_1380</i> | 1 | 0 |
| <i>OTU_1183</i> | 1 | 5 | 0 |  |  |  | <i>OTU_44</i>   | 1 | 0 | 0 | <i>OTU_838</i> | 0 | 0 | 1 | <i>OTU_1428</i> | 0 | 1 |



|                 |   |   |   |  |  |  |                |   |   |   |                 |   |   |   |                 |   |   |
|-----------------|---|---|---|--|--|--|----------------|---|---|---|-----------------|---|---|---|-----------------|---|---|
| <i>OTU_1202</i> | 0 | 3 | 3 |  |  |  | <i>OTU_46</i>  | 0 | 1 | 0 | <i>OTU_845</i>  | 0 | 1 | 0 | <i>OTU_1433</i> | 1 | 0 |
| <i>OTU_1311</i> | 0 | 4 | 2 |  |  |  | <i>OTU_51</i>  | 0 | 0 | 1 | <i>OTU_905</i>  | 0 | 0 | 1 | <i>OTU_1435</i> | 1 | 0 |
| <i>OTU_1505</i> | 1 | 0 | 5 |  |  |  | <i>OTU_81</i>  | 0 | 1 | 0 | <i>OTU_923</i>  | 0 | 1 | 0 | <i>OTU_1487</i> | 1 | 0 |
| <i>OTU_1589</i> | 0 | 1 | 5 |  |  |  | <i>OTU_99</i>  | 0 | 0 | 1 | <i>OTU_942</i>  | 0 | 0 | 1 | <i>OTU_1495</i> | 0 | 1 |
| <i>OTU_131</i>  | 0 | 3 | 2 |  |  |  | <i>OTU_102</i> | 1 | 0 | 0 | <i>OTU_945</i>  | 0 | 1 | 0 | <i>OTU_1559</i> | 1 | 0 |
| <i>OTU_139</i>  | 0 | 5 | 0 |  |  |  | <i>OTU_107</i> | 0 | 0 | 1 | <i>OTU_954</i>  | 1 | 0 | 0 | <i>OTU_1596</i> | 1 | 0 |
| <i>OTU_179</i>  | 5 | 0 | 0 |  |  |  | <i>OTU_118</i> | 0 | 1 | 0 | <i>OTU_993</i>  | 0 | 1 | 0 | <i>OTU_1614</i> | 1 | 0 |
| <i>OTU_194</i>  | 1 | 4 | 0 |  |  |  | <i>OTU_133</i> | 1 | 0 | 0 | <i>OTU_995</i>  | 1 | 0 | 0 | <i>OTU_1615</i> | 0 | 1 |
| <i>OTU_367</i>  | 4 | 1 | 0 |  |  |  | <i>OTU_138</i> | 1 | 0 | 0 | <i>OTU_1008</i> | 0 | 0 | 1 | <i>OTU_1635</i> | 0 | 1 |
| <i>OTU_502</i>  | 3 | 2 | 0 |  |  |  | <i>OTU_144</i> | 0 | 0 | 1 | <i>OTU_1025</i> | 0 | 1 | 0 | <i>OTU_1681</i> | 0 | 1 |
| <i>OTU_520</i>  | 1 | 4 | 0 |  |  |  | <i>OTU_174</i> | 0 | 1 | 0 | <i>OTU_1098</i> | 0 | 1 | 0 | <i>OTU_1690</i> | 0 | 1 |
| <i>OTU_597</i>  | 1 | 3 | 1 |  |  |  | <i>OTU_207</i> | 0 | 0 | 1 | <i>OTU_1107</i> | 1 | 0 | 0 | <i>OTU_1699</i> | 1 | 0 |
| <i>OTU_646</i>  | 3 | 1 | 1 |  |  |  | <i>OTU_213</i> | 1 | 0 | 0 | <i>OTU_1109</i> | 0 | 1 | 0 | <i>OTU_1714</i> | 0 | 1 |
| <i>OTU_737</i>  | 1 | 3 | 1 |  |  |  | <i>OTU_229</i> | 1 | 0 | 0 | <i>OTU_1155</i> | 0 | 0 | 1 | <i>OTU_1720</i> | 1 | 0 |
| <i>OTU_790</i>  | 0 | 5 | 0 |  |  |  | <i>OTU_261</i> | 1 | 0 | 0 | <i>OTU_1165</i> | 0 | 0 | 1 | <i>OTU_1727</i> | 1 | 0 |
| <i>OTU_846</i>  | 0 | 0 | 5 |  |  |  | <i>OTU_279</i> | 0 | 0 | 1 | <i>OTU_1193</i> | 0 | 0 | 1 | <i>OTU_1754</i> | 0 | 1 |
| <i>OTU_886</i>  | 0 | 0 | 5 |  |  |  | <i>OTU_280</i> | 0 | 0 | 1 | <i>OTU_1200</i> | 0 | 0 | 1 | <i>OTU_1765</i> | 1 | 0 |
| <i>OTU_908</i>  | 1 | 4 | 0 |  |  |  | <i>OTU_290</i> | 1 | 0 | 0 | <i>OTU_1218</i> | 0 | 1 | 0 | <i>OTU_1801</i> | 1 | 0 |
| <i>OTU_1061</i> | 0 | 0 | 5 |  |  |  | <i>OTU_303</i> | 0 | 0 | 1 | <i>OTU_1238</i> | 0 | 0 | 1 | <i>OTU_1843</i> | 0 | 1 |
| <i>OTU_1062</i> | 0 | 1 | 4 |  |  |  | <i>OTU_337</i> | 0 | 0 | 1 | <i>OTU_1260</i> | 0 | 1 | 0 |                 |   |   |
| <i>OTU_1112</i> | 3 | 0 | 2 |  |  |  | <i>OTU_346</i> | 0 | 0 | 1 | <i>OTU_1267</i> | 0 | 1 | 0 |                 |   |   |
| <i>OTU_1117</i> | 0 | 4 | 1 |  |  |  | <i>OTU_436</i> | 1 | 0 | 0 | <i>OTU_1309</i> | 0 | 1 | 0 |                 |   |   |
| <i>OTU_1121</i> | 0 | 0 | 5 |  |  |  | <i>OTU_455</i> | 1 | 0 | 0 | <i>OTU_1348</i> | 1 | 0 | 0 |                 |   |   |
| <i>OTU_1156</i> | 0 | 0 | 5 |  |  |  | <i>OTU_467</i> | 0 | 1 | 0 | <i>OTU_1349</i> | 0 | 0 | 1 |                 |   |   |
| <i>OTU_1161</i> | 0 | 5 | 0 |  |  |  | <i>OTU_472</i> | 1 | 0 | 0 | <i>OTU_1356</i> | 1 | 0 | 0 |                 |   |   |
| <i>OTU_1177</i> | 0 | 5 | 0 |  |  |  | <i>OTU_476</i> | 0 | 0 | 1 | <i>OTU_1379</i> | 0 | 0 | 1 |                 |   |   |
| <i>OTU_1188</i> | 1 | 4 | 0 |  |  |  | <i>OTU_485</i> | 0 | 1 | 0 | <i>OTU_1380</i> | 1 | 0 | 0 |                 |   |   |
| <i>OTU_1205</i> | 0 | 5 | 0 |  |  |  | <i>OTU_502</i> | 1 | 0 | 0 | <i>OTU_1415</i> | 0 | 1 | 0 |                 |   |   |
| <i>OTU_1301</i> | 0 | 0 | 5 |  |  |  | <i>OTU_520</i> | 1 | 0 | 0 | <i>OTU_1418</i> | 0 | 0 | 1 |                 |   |   |
| <i>OTU_1327</i> | 0 | 0 | 5 |  |  |  | <i>OTU_530</i> | 0 | 1 | 0 | <i>OTU_1449</i> | 0 | 0 | 1 |                 |   |   |

|                 |   |   |   |  |  |  |                 |   |   |   |                 |   |   |   |  |  |  |
|-----------------|---|---|---|--|--|--|-----------------|---|---|---|-----------------|---|---|---|--|--|--|
| <i>OTU_1367</i> | 0 | 0 | 5 |  |  |  | <i>OTU_550</i>  | 1 | 0 | 0 | <i>OTU_1495</i> | 0 | 0 | 1 |  |  |  |
| <i>OTU_1746</i> | 1 | 0 | 4 |  |  |  | <i>OTU_551</i>  | 0 | 1 | 0 | <i>OTU_1500</i> | 0 | 0 | 1 |  |  |  |
| <i>OTU_1760</i> | 0 | 0 | 5 |  |  |  | <i>OTU_596</i>  | 0 | 0 | 1 | <i>OTU_1519</i> | 0 | 1 | 0 |  |  |  |
| <i>OTU_1809</i> | 0 | 4 | 1 |  |  |  | <i>OTU_625</i>  | 0 | 0 | 1 | <i>OTU_1521</i> | 0 | 0 | 1 |  |  |  |
| <i>OTU_1852</i> | 2 | 3 | 0 |  |  |  | <i>OTU_679</i>  | 1 | 0 | 0 | <i>OTU_1536</i> | 0 | 1 | 0 |  |  |  |
| <i>OTU_7</i>    | 0 | 3 | 1 |  |  |  | <i>OTU_747</i>  | 0 | 0 | 1 | <i>OTU_1616</i> | 0 | 0 | 1 |  |  |  |
| <i>OTU_212</i>  | 0 | 2 | 2 |  |  |  | <i>OTU_766</i>  | 1 | 0 | 0 | <i>OTU_1633</i> | 0 | 0 | 1 |  |  |  |
| <i>OTU_218</i>  | 0 | 4 | 0 |  |  |  | <i>OTU_777</i>  | 0 | 0 | 1 | <i>OTU_1696</i> | 0 | 0 | 1 |  |  |  |
| <i>OTU_290</i>  | 4 | 0 | 0 |  |  |  | <i>OTU_781</i>  | 1 | 0 | 0 | <i>OTU_1738</i> | 0 | 0 | 1 |  |  |  |
| <i>OTU_389</i>  | 0 | 3 | 1 |  |  |  | <i>OTU_782</i>  | 0 | 1 | 0 | <i>OTU_1754</i> | 0 | 0 | 1 |  |  |  |
| <i>OTU_454</i>  | 0 | 4 | 0 |  |  |  | <i>OTU_785</i>  | 1 | 0 | 0 | <i>OTU_1843</i> | 0 | 0 | 1 |  |  |  |
| <i>OTU_500</i>  | 0 | 4 | 0 |  |  |  | <i>OTU_797</i>  | 1 | 0 | 0 | <i>OTU_1860</i> | 0 | 0 | 1 |  |  |  |
| <i>OTU_606</i>  | 0 | 0 | 4 |  |  |  | <i>OTU_851</i>  | 0 | 0 | 1 | <i>OTU_1898</i> | 0 | 0 | 1 |  |  |  |
| <i>OTU_712</i>  | 0 | 4 | 0 |  |  |  | <i>OTU_882</i>  | 0 | 0 | 1 | <i>OTU_1907</i> | 0 | 0 | 1 |  |  |  |
| <i>OTU_770</i>  | 0 | 4 | 0 |  |  |  | <i>OTU_919</i>  | 0 | 1 | 0 |                 |   |   |   |  |  |  |
| <i>OTU_793</i>  | 2 | 2 | 0 |  |  |  | <i>OTU_923</i>  | 1 | 0 | 0 |                 |   |   |   |  |  |  |
| <i>OTU_953</i>  | 4 | 0 | 0 |  |  |  | <i>OTU_993</i>  | 1 | 0 | 0 |                 |   |   |   |  |  |  |
| <i>OTU_1078</i> | 0 | 0 | 4 |  |  |  | <i>OTU_1062</i> | 0 | 1 | 0 |                 |   |   |   |  |  |  |
| <i>OTU_1132</i> | 0 | 0 | 4 |  |  |  | <i>OTU_1077</i> | 0 | 1 | 0 |                 |   |   |   |  |  |  |
| <i>OTU_1137</i> | 0 | 4 | 0 |  |  |  | <i>OTU_1096</i> | 0 | 1 | 0 |                 |   |   |   |  |  |  |
| <i>OTU_1189</i> | 0 | 0 | 4 |  |  |  | <i>OTU_1174</i> | 1 | 0 | 0 |                 |   |   |   |  |  |  |
| <i>OTU_1247</i> | 0 | 4 | 0 |  |  |  | <i>OTU_1202</i> | 1 | 0 | 0 |                 |   |   |   |  |  |  |
| <i>OTU_1266</i> | 0 | 0 | 4 |  |  |  | <i>OTU_1221</i> | 1 | 0 | 0 |                 |   |   |   |  |  |  |
| <i>OTU_1333</i> | 4 | 0 | 0 |  |  |  | <i>OTU_1271</i> | 0 | 1 | 0 |                 |   |   |   |  |  |  |
| <i>OTU_1364</i> | 0 | 0 | 4 |  |  |  | <i>OTU_1279</i> | 1 | 0 | 0 |                 |   |   |   |  |  |  |
| <i>OTU_1381</i> | 0 | 0 | 4 |  |  |  | <i>OTU_1306</i> | 1 | 0 | 0 |                 |   |   |   |  |  |  |
| <i>OTU_1473</i> | 0 | 0 | 4 |  |  |  | <i>OTU_1310</i> | 1 | 0 | 0 |                 |   |   |   |  |  |  |
| <i>OTU_1483</i> | 0 | 4 | 0 |  |  |  | <i>OTU_1365</i> | 0 | 1 | 0 |                 |   |   |   |  |  |  |
| <i>OTU_1583</i> | 0 | 0 | 4 |  |  |  | <i>OTU_1392</i> | 0 | 1 | 0 |                 |   |   |   |  |  |  |
| <i>OTU_1622</i> | 0 | 0 | 4 |  |  |  | <i>OTU_1402</i> | 0 | 1 | 0 |                 |   |   |   |  |  |  |

|                 |   |   |   |  |  |  |                 |   |   |   |  |  |  |  |  |  |  |  |  |
|-----------------|---|---|---|--|--|--|-----------------|---|---|---|--|--|--|--|--|--|--|--|--|
| <i>OTU_1683</i> | 2 | 2 | 0 |  |  |  | <i>OTU_1410</i> | 0 | 1 | 0 |  |  |  |  |  |  |  |  |  |
| <i>OTU_1689</i> | 0 | 4 | 0 |  |  |  | <i>OTU_1415</i> | 0 | 1 | 0 |  |  |  |  |  |  |  |  |  |
| <i>OTU_1715</i> | 0 | 0 | 4 |  |  |  | <i>OTU_1426</i> | 0 | 1 | 0 |  |  |  |  |  |  |  |  |  |
| <i>OTU_1728</i> | 0 | 3 | 1 |  |  |  | <i>OTU_1482</i> | 0 | 1 | 0 |  |  |  |  |  |  |  |  |  |
| <i>OTU_1745</i> | 0 | 0 | 4 |  |  |  | <i>OTU_1497</i> | 1 | 0 | 0 |  |  |  |  |  |  |  |  |  |
| <i>OTU_1766</i> | 0 | 0 | 4 |  |  |  | <i>OTU_1505</i> | 1 | 0 | 0 |  |  |  |  |  |  |  |  |  |
| <i>OTU_1781</i> | 0 | 4 | 0 |  |  |  | <i>OTU_1624</i> | 1 | 0 | 0 |  |  |  |  |  |  |  |  |  |
| <i>OTU_1885</i> | 3 | 1 | 0 |  |  |  | <i>OTU_1633</i> | 1 | 0 | 0 |  |  |  |  |  |  |  |  |  |
| <i>OTU_34</i>   | 0 | 3 | 0 |  |  |  | <i>OTU_1640</i> | 0 | 0 | 1 |  |  |  |  |  |  |  |  |  |
| <i>OTU_48</i>   | 0 | 3 | 0 |  |  |  | <i>OTU_1650</i> | 0 | 0 | 1 |  |  |  |  |  |  |  |  |  |
| <i>OTU_134</i>  | 0 | 0 | 3 |  |  |  | <i>OTU_1655</i> | 0 | 1 | 0 |  |  |  |  |  |  |  |  |  |
| <i>OTU_156</i>  | 2 | 1 | 0 |  |  |  | <i>OTU_1725</i> | 0 | 0 | 1 |  |  |  |  |  |  |  |  |  |
| <i>OTU_258</i>  | 2 | 1 | 0 |  |  |  | <i>OTU_1727</i> | 1 | 0 | 0 |  |  |  |  |  |  |  |  |  |
| <i>OTU_279</i>  | 0 | 2 | 1 |  |  |  | <i>OTU_1732</i> | 1 | 0 | 0 |  |  |  |  |  |  |  |  |  |
| <i>OTU_297</i>  | 3 | 0 | 0 |  |  |  | <i>OTU_1755</i> | 1 | 0 | 0 |  |  |  |  |  |  |  |  |  |
| <i>OTU_339</i>  | 0 | 3 | 0 |  |  |  | <i>OTU_1788</i> | 0 | 1 | 0 |  |  |  |  |  |  |  |  |  |
| <i>OTU_424</i>  | 2 | 1 | 0 |  |  |  | <i>OTU_1854</i> | 0 | 0 | 1 |  |  |  |  |  |  |  |  |  |
| <i>OTU_450</i>  | 0 | 2 | 1 |  |  |  | <i>OTU_1895</i> | 0 | 0 | 1 |  |  |  |  |  |  |  |  |  |
| <i>OTU_455</i>  | 0 | 3 | 0 |  |  |  | <i>OTU_1907</i> | 1 | 0 | 0 |  |  |  |  |  |  |  |  |  |
| <i>OTU_493</i>  | 0 | 3 | 0 |  |  |  | <i>OTU_1916</i> | 0 | 1 | 0 |  |  |  |  |  |  |  |  |  |
| <i>OTU_532</i>  | 0 | 2 | 1 |  |  |  |                 |   |   |   |  |  |  |  |  |  |  |  |  |
| <i>OTU_648</i>  | 1 | 2 | 0 |  |  |  |                 |   |   |   |  |  |  |  |  |  |  |  |  |
| <i>OTU_650</i>  | 0 | 3 | 0 |  |  |  |                 |   |   |   |  |  |  |  |  |  |  |  |  |
| <i>OTU_709</i>  | 0 | 3 | 0 |  |  |  |                 |   |   |   |  |  |  |  |  |  |  |  |  |
| <i>OTU_881</i>  | 0 | 3 | 0 |  |  |  |                 |   |   |   |  |  |  |  |  |  |  |  |  |
| <i>OTU_889</i>  | 0 | 3 | 0 |  |  |  |                 |   |   |   |  |  |  |  |  |  |  |  |  |
| <i>OTU_1123</i> | 0 | 3 | 0 |  |  |  |                 |   |   |   |  |  |  |  |  |  |  |  |  |
| <i>OTU_1143</i> | 0 | 0 | 3 |  |  |  |                 |   |   |   |  |  |  |  |  |  |  |  |  |
| <i>OTU_1150</i> | 0 | 2 | 1 |  |  |  |                 |   |   |   |  |  |  |  |  |  |  |  |  |
| <i>OTU_1310</i> | 3 | 0 | 0 |  |  |  |                 |   |   |   |  |  |  |  |  |  |  |  |  |

|                 |   |   |   |  |  |  |  |  |  |  |  |  |  |  |  |  |  |
|-----------------|---|---|---|--|--|--|--|--|--|--|--|--|--|--|--|--|--|
| <i>OTU_1337</i> | 1 | 2 | 0 |  |  |  |  |  |  |  |  |  |  |  |  |  |  |
| <i>OTU_1354</i> | 0 | 0 | 3 |  |  |  |  |  |  |  |  |  |  |  |  |  |  |
| <i>OTU_1361</i> | 0 | 0 | 3 |  |  |  |  |  |  |  |  |  |  |  |  |  |  |
| <i>OTU_1394</i> | 1 | 1 | 1 |  |  |  |  |  |  |  |  |  |  |  |  |  |  |
| <i>OTU_1500</i> | 0 | 2 | 1 |  |  |  |  |  |  |  |  |  |  |  |  |  |  |
| <i>OTU_1523</i> | 0 | 3 | 0 |  |  |  |  |  |  |  |  |  |  |  |  |  |  |
| <i>OTU_1533</i> | 0 | 3 | 0 |  |  |  |  |  |  |  |  |  |  |  |  |  |  |
| <i>OTU_1534</i> | 0 | 3 | 0 |  |  |  |  |  |  |  |  |  |  |  |  |  |  |
| <i>OTU_1565</i> | 1 | 2 | 0 |  |  |  |  |  |  |  |  |  |  |  |  |  |  |
| <i>OTU_1586</i> | 3 | 0 | 0 |  |  |  |  |  |  |  |  |  |  |  |  |  |  |
| <i>OTU_1588</i> | 0 | 3 | 0 |  |  |  |  |  |  |  |  |  |  |  |  |  |  |
| <i>OTU_1595</i> | 0 | 3 | 0 |  |  |  |  |  |  |  |  |  |  |  |  |  |  |
| <i>OTU_1611</i> | 0 | 3 | 0 |  |  |  |  |  |  |  |  |  |  |  |  |  |  |
| <i>OTU_1620</i> | 0 | 3 | 0 |  |  |  |  |  |  |  |  |  |  |  |  |  |  |
| <i>OTU_1666</i> | 0 | 3 | 0 |  |  |  |  |  |  |  |  |  |  |  |  |  |  |
| <i>OTU_1673</i> | 0 | 0 | 3 |  |  |  |  |  |  |  |  |  |  |  |  |  |  |
| <i>OTU_1680</i> | 0 | 0 | 3 |  |  |  |  |  |  |  |  |  |  |  |  |  |  |
| <i>OTU_1707</i> | 0 | 1 | 2 |  |  |  |  |  |  |  |  |  |  |  |  |  |  |
| <i>OTU_1721</i> | 0 | 3 | 0 |  |  |  |  |  |  |  |  |  |  |  |  |  |  |
| <i>OTU_1722</i> | 1 | 2 | 0 |  |  |  |  |  |  |  |  |  |  |  |  |  |  |
| <i>OTU_1729</i> | 0 | 0 | 3 |  |  |  |  |  |  |  |  |  |  |  |  |  |  |
| <i>OTU_1753</i> | 0 | 0 | 3 |  |  |  |  |  |  |  |  |  |  |  |  |  |  |
| <i>OTU_1825</i> | 0 | 0 | 3 |  |  |  |  |  |  |  |  |  |  |  |  |  |  |
| <i>OTU_1837</i> | 0 | 3 | 0 |  |  |  |  |  |  |  |  |  |  |  |  |  |  |
| <i>OTU_1856</i> | 0 | 3 | 0 |  |  |  |  |  |  |  |  |  |  |  |  |  |  |
| <i>OTU_1900</i> | 0 | 0 | 3 |  |  |  |  |  |  |  |  |  |  |  |  |  |  |
| <i>OTU_1903</i> | 0 | 0 | 3 |  |  |  |  |  |  |  |  |  |  |  |  |  |  |
| <i>OTU_9</i>    | 0 | 2 | 0 |  |  |  |  |  |  |  |  |  |  |  |  |  |  |
| <i>OTU_16</i>   | 0 | 2 | 0 |  |  |  |  |  |  |  |  |  |  |  |  |  |  |
| <i>OTU_21</i>   | 0 | 0 | 2 |  |  |  |  |  |  |  |  |  |  |  |  |  |  |

|                |   |   |   |  |  |  |  |  |  |  |  |  |  |  |  |  |  |
|----------------|---|---|---|--|--|--|--|--|--|--|--|--|--|--|--|--|--|
| <i>OTU_45</i>  | 0 | 2 | 0 |  |  |  |  |  |  |  |  |  |  |  |  |  |  |
| <i>OTU_54</i>  | 0 | 2 | 0 |  |  |  |  |  |  |  |  |  |  |  |  |  |  |
| <i>OTU_56</i>  | 0 | 2 | 0 |  |  |  |  |  |  |  |  |  |  |  |  |  |  |
| <i>OTU_57</i>  | 0 | 2 | 0 |  |  |  |  |  |  |  |  |  |  |  |  |  |  |
| <i>OTU_60</i>  | 2 | 0 | 0 |  |  |  |  |  |  |  |  |  |  |  |  |  |  |
| <i>OTU_67</i>  | 1 | 1 | 0 |  |  |  |  |  |  |  |  |  |  |  |  |  |  |
| <i>OTU_71</i>  | 2 | 0 | 0 |  |  |  |  |  |  |  |  |  |  |  |  |  |  |
| <i>OTU_95</i>  | 0 | 2 | 0 |  |  |  |  |  |  |  |  |  |  |  |  |  |  |
| <i>OTU_97</i>  | 0 | 2 | 0 |  |  |  |  |  |  |  |  |  |  |  |  |  |  |
| <i>OTU_122</i> | 0 | 2 | 0 |  |  |  |  |  |  |  |  |  |  |  |  |  |  |
| <i>OTU_170</i> | 0 | 2 | 0 |  |  |  |  |  |  |  |  |  |  |  |  |  |  |
| <i>OTU_199</i> | 0 | 2 | 0 |  |  |  |  |  |  |  |  |  |  |  |  |  |  |
| <i>OTU_247</i> | 0 | 2 | 0 |  |  |  |  |  |  |  |  |  |  |  |  |  |  |
| <i>OTU_271</i> | 0 | 2 | 0 |  |  |  |  |  |  |  |  |  |  |  |  |  |  |
| <i>OTU_277</i> | 1 | 1 | 0 |  |  |  |  |  |  |  |  |  |  |  |  |  |  |
| <i>OTU_324</i> | 0 | 2 | 0 |  |  |  |  |  |  |  |  |  |  |  |  |  |  |
| <i>OTU_329</i> | 0 | 1 | 1 |  |  |  |  |  |  |  |  |  |  |  |  |  |  |
| <i>OTU_335</i> | 2 | 0 | 0 |  |  |  |  |  |  |  |  |  |  |  |  |  |  |
| <i>OTU_342</i> | 0 | 2 | 0 |  |  |  |  |  |  |  |  |  |  |  |  |  |  |
| <i>OTU_348</i> | 0 | 0 | 2 |  |  |  |  |  |  |  |  |  |  |  |  |  |  |
| <i>OTU_355</i> | 2 | 0 | 0 |  |  |  |  |  |  |  |  |  |  |  |  |  |  |
| <i>OTU_378</i> | 0 | 2 | 0 |  |  |  |  |  |  |  |  |  |  |  |  |  |  |
| <i>OTU_382</i> | 0 | 2 | 0 |  |  |  |  |  |  |  |  |  |  |  |  |  |  |
| <i>OTU_403</i> | 0 | 0 | 2 |  |  |  |  |  |  |  |  |  |  |  |  |  |  |
| <i>OTU_416</i> | 0 | 1 | 1 |  |  |  |  |  |  |  |  |  |  |  |  |  |  |
| <i>OTU_452</i> | 2 | 0 | 0 |  |  |  |  |  |  |  |  |  |  |  |  |  |  |
| <i>OTU_485</i> | 0 | 1 | 1 |  |  |  |  |  |  |  |  |  |  |  |  |  |  |
| <i>OTU_504</i> | 0 | 0 | 2 |  |  |  |  |  |  |  |  |  |  |  |  |  |  |
| <i>OTU_604</i> | 0 | 2 | 0 |  |  |  |  |  |  |  |  |  |  |  |  |  |  |
| <i>OTU_632</i> | 0 | 0 | 2 |  |  |  |  |  |  |  |  |  |  |  |  |  |  |

|                 |   |   |   |  |  |  |  |  |  |  |  |  |  |  |  |  |  |
|-----------------|---|---|---|--|--|--|--|--|--|--|--|--|--|--|--|--|--|
| <i>OTU_667</i>  | 2 | 0 | 0 |  |  |  |  |  |  |  |  |  |  |  |  |  |  |
| <i>OTU_757</i>  | 0 | 2 | 0 |  |  |  |  |  |  |  |  |  |  |  |  |  |  |
| <i>OTU_788</i>  | 1 | 1 | 0 |  |  |  |  |  |  |  |  |  |  |  |  |  |  |
| <i>OTU_810</i>  | 0 | 0 | 2 |  |  |  |  |  |  |  |  |  |  |  |  |  |  |
| <i>OTU_900</i>  | 2 | 0 | 0 |  |  |  |  |  |  |  |  |  |  |  |  |  |  |
| <i>OTU_1056</i> | 0 | 2 | 0 |  |  |  |  |  |  |  |  |  |  |  |  |  |  |
| <i>OTU_1096</i> | 0 | 2 | 0 |  |  |  |  |  |  |  |  |  |  |  |  |  |  |
| <i>OTU_1099</i> | 0 | 2 | 0 |  |  |  |  |  |  |  |  |  |  |  |  |  |  |
| <i>OTU_1200</i> | 0 | 2 | 0 |  |  |  |  |  |  |  |  |  |  |  |  |  |  |
| <i>OTU_1262</i> | 2 | 0 | 0 |  |  |  |  |  |  |  |  |  |  |  |  |  |  |
| <i>OTU_1270</i> | 2 | 0 | 0 |  |  |  |  |  |  |  |  |  |  |  |  |  |  |
| <i>OTU_1280</i> | 0 | 2 | 0 |  |  |  |  |  |  |  |  |  |  |  |  |  |  |
| <i>OTU_1386</i> | 0 | 2 | 0 |  |  |  |  |  |  |  |  |  |  |  |  |  |  |
| <i>OTU_1388</i> | 0 | 2 | 0 |  |  |  |  |  |  |  |  |  |  |  |  |  |  |
| <i>OTU_1430</i> | 0 | 1 | 1 |  |  |  |  |  |  |  |  |  |  |  |  |  |  |
| <i>OTU_1482</i> | 0 | 1 | 1 |  |  |  |  |  |  |  |  |  |  |  |  |  |  |
| <i>OTU_1624</i> | 0 | 1 | 1 |  |  |  |  |  |  |  |  |  |  |  |  |  |  |
| <i>OTU_1665</i> | 0 | 2 | 0 |  |  |  |  |  |  |  |  |  |  |  |  |  |  |
| <i>OTU_1732</i> | 0 | 1 | 1 |  |  |  |  |  |  |  |  |  |  |  |  |  |  |
| <i>OTU_1807</i> | 0 | 2 | 0 |  |  |  |  |  |  |  |  |  |  |  |  |  |  |
| <i>OTU_1863</i> | 0 | 2 | 0 |  |  |  |  |  |  |  |  |  |  |  |  |  |  |
| <i>OTU_1886</i> | 1 | 1 | 0 |  |  |  |  |  |  |  |  |  |  |  |  |  |  |
| <i>OTU_1895</i> | 1 | 1 | 0 |  |  |  |  |  |  |  |  |  |  |  |  |  |  |
| <i>OTU_25</i>   | 1 | 0 | 0 |  |  |  |  |  |  |  |  |  |  |  |  |  |  |
| <i>OTU_31</i>   | 1 | 0 | 0 |  |  |  |  |  |  |  |  |  |  |  |  |  |  |
| <i>OTU_58</i>   | 0 | 1 | 0 |  |  |  |  |  |  |  |  |  |  |  |  |  |  |
| <i>OTU_75</i>   | 0 | 0 | 1 |  |  |  |  |  |  |  |  |  |  |  |  |  |  |
| <i>OTU_84</i>   | 0 | 1 | 0 |  |  |  |  |  |  |  |  |  |  |  |  |  |  |
| <i>OTU_89</i>   | 0 | 1 | 0 |  |  |  |  |  |  |  |  |  |  |  |  |  |  |
| <i>OTU_186</i>  | 0 | 1 | 0 |  |  |  |  |  |  |  |  |  |  |  |  |  |  |

|                 |   |   |   |  |  |  |  |  |  |  |  |  |  |  |  |  |  |
|-----------------|---|---|---|--|--|--|--|--|--|--|--|--|--|--|--|--|--|
| <i>OTU_203</i>  | 0 | 1 | 0 |  |  |  |  |  |  |  |  |  |  |  |  |  |  |
| <i>OTU_226</i>  | 0 | 1 | 0 |  |  |  |  |  |  |  |  |  |  |  |  |  |  |
| <i>OTU_230</i>  | 0 | 1 | 0 |  |  |  |  |  |  |  |  |  |  |  |  |  |  |
| <i>OTU_233</i>  | 0 | 0 | 1 |  |  |  |  |  |  |  |  |  |  |  |  |  |  |
| <i>OTU_240</i>  | 0 | 0 | 1 |  |  |  |  |  |  |  |  |  |  |  |  |  |  |
| <i>OTU_254</i>  | 0 | 0 | 1 |  |  |  |  |  |  |  |  |  |  |  |  |  |  |
| <i>OTU_272</i>  | 0 | 1 | 0 |  |  |  |  |  |  |  |  |  |  |  |  |  |  |
| <i>OTU_321</i>  | 0 | 1 | 0 |  |  |  |  |  |  |  |  |  |  |  |  |  |  |
| <i>OTU_336</i>  | 0 | 1 | 0 |  |  |  |  |  |  |  |  |  |  |  |  |  |  |
| <i>OTU_338</i>  | 0 | 1 | 0 |  |  |  |  |  |  |  |  |  |  |  |  |  |  |
| <i>OTU_407</i>  | 0 | 1 | 0 |  |  |  |  |  |  |  |  |  |  |  |  |  |  |
| <i>OTU_451</i>  | 0 | 1 | 0 |  |  |  |  |  |  |  |  |  |  |  |  |  |  |
| <i>OTU_475</i>  | 0 | 1 | 0 |  |  |  |  |  |  |  |  |  |  |  |  |  |  |
| <i>OTU_623</i>  | 0 | 1 | 0 |  |  |  |  |  |  |  |  |  |  |  |  |  |  |
| <i>OTU_637</i>  | 0 | 1 | 0 |  |  |  |  |  |  |  |  |  |  |  |  |  |  |
| <i>OTU_744</i>  | 0 | 1 | 0 |  |  |  |  |  |  |  |  |  |  |  |  |  |  |
| <i>OTU_805</i>  | 0 | 0 | 1 |  |  |  |  |  |  |  |  |  |  |  |  |  |  |
| <i>OTU_836</i>  | 0 | 1 | 0 |  |  |  |  |  |  |  |  |  |  |  |  |  |  |
| <i>OTU_872</i>  | 0 | 1 | 0 |  |  |  |  |  |  |  |  |  |  |  |  |  |  |
| <i>OTU_880</i>  | 0 | 0 | 1 |  |  |  |  |  |  |  |  |  |  |  |  |  |  |
| <i>OTU_914</i>  | 0 | 1 | 0 |  |  |  |  |  |  |  |  |  |  |  |  |  |  |
| <i>OTU_986</i>  | 0 | 0 | 1 |  |  |  |  |  |  |  |  |  |  |  |  |  |  |
| <i>OTU_989</i>  | 0 | 1 | 0 |  |  |  |  |  |  |  |  |  |  |  |  |  |  |
| <i>OTU_996</i>  | 0 | 1 | 0 |  |  |  |  |  |  |  |  |  |  |  |  |  |  |
| <i>OTU_1051</i> | 0 | 1 | 0 |  |  |  |  |  |  |  |  |  |  |  |  |  |  |
| <i>OTU_1216</i> | 0 | 1 | 0 |  |  |  |  |  |  |  |  |  |  |  |  |  |  |
| <i>OTU_1221</i> | 0 | 1 | 0 |  |  |  |  |  |  |  |  |  |  |  |  |  |  |
| <i>OTU_1230</i> | 0 | 1 | 0 |  |  |  |  |  |  |  |  |  |  |  |  |  |  |
| <i>OTU_1279</i> | 0 | 1 | 0 |  |  |  |  |  |  |  |  |  |  |  |  |  |  |
| <i>OTU_1291</i> | 0 | 1 | 0 |  |  |  |  |  |  |  |  |  |  |  |  |  |  |

|                 |   |   |   |  |  |  |  |  |  |  |  |  |  |  |  |  |  |
|-----------------|---|---|---|--|--|--|--|--|--|--|--|--|--|--|--|--|--|
| <i>OTU_1303</i> | 0 | 1 | 0 |  |  |  |  |  |  |  |  |  |  |  |  |  |  |
| <i>OTU_1309</i> | 0 | 1 | 0 |  |  |  |  |  |  |  |  |  |  |  |  |  |  |
| <i>OTU_1326</i> | 1 | 0 | 0 |  |  |  |  |  |  |  |  |  |  |  |  |  |  |
| <i>OTU_1392</i> | 0 | 1 | 0 |  |  |  |  |  |  |  |  |  |  |  |  |  |  |
| <i>OTU_1411</i> | 0 | 1 | 0 |  |  |  |  |  |  |  |  |  |  |  |  |  |  |
| <i>OTU_1428</i> | 0 | 1 | 0 |  |  |  |  |  |  |  |  |  |  |  |  |  |  |
| <i>OTU_1506</i> | 0 | 1 | 0 |  |  |  |  |  |  |  |  |  |  |  |  |  |  |
| <i>OTU_1539</i> | 0 | 1 | 0 |  |  |  |  |  |  |  |  |  |  |  |  |  |  |
| <i>OTU_1582</i> | 0 | 1 | 0 |  |  |  |  |  |  |  |  |  |  |  |  |  |  |
| <i>OTU_1650</i> | 0 | 1 | 0 |  |  |  |  |  |  |  |  |  |  |  |  |  |  |
| <i>OTU_1692</i> | 1 | 0 | 0 |  |  |  |  |  |  |  |  |  |  |  |  |  |  |
| <i>OTU_1714</i> | 0 | 1 | 0 |  |  |  |  |  |  |  |  |  |  |  |  |  |  |
| <i>OTU_1780</i> | 0 | 1 | 0 |  |  |  |  |  |  |  |  |  |  |  |  |  |  |
| <i>OTU_1788</i> | 0 | 1 | 0 |  |  |  |  |  |  |  |  |  |  |  |  |  |  |
| <i>OTU_1810</i> | 0 | 0 | 1 |  |  |  |  |  |  |  |  |  |  |  |  |  |  |
| <i>OTU_1898</i> | 0 | 0 | 1 |  |  |  |  |  |  |  |  |  |  |  |  |  |  |



**Table S2.** Comparison of rarefied (R) and non-rarefied (NR) data performance of the bacterial operational taxonomic units (OTUs) in all the investigated developmental stages of *Sparus aurata* larvae. Replicated samples: a, b, c.

|             | Sequence reads |     | OTUs |    | S <sub>Chao</sub> coverage |       |
|-------------|----------------|-----|------|----|----------------------------|-------|
|             | NR             | R   | NR   | R  | NR                         | R     |
| <b>D0a</b>  | 2487           | 335 | 130  | 45 | 0.972                      | 0.934 |
| <b>D0b</b>  | 4762           | 335 | 305  | 70 | 0.970                      | 0.893 |
| <b>D0c</b>  | 6327           | 335 | 217  | 70 | 0.970                      | 0.884 |
| <b>D5a</b>  | 6119           | 335 | 94   | 19 | 0.994                      | 0.973 |
| <b>D5b</b>  | 7626           | 335 | 91   | 12 | 0.991                      | 0.988 |
| <b>D15a</b> | 4364           | 335 | 170  | 33 | 0.981                      | 0.952 |
| <b>D15b</b> | 1321           | 335 | 127  | 36 | 0.987                      | 0.949 |
| <b>D15c</b> | 2808           | 335 | 185  | 27 | 0.985                      | 0.964 |
| <b>D21a</b> | 650            | 335 | 108  | 29 | 0.976                      | 0.952 |
| <b>D21b</b> | 1539           | 335 | 150  | 36 | 0.982                      | 0.949 |
| <b>D21c</b> | 1002           | 335 | 165  | 51 | 0.975                      | 0.896 |
| <b>D71a</b> | 997            | 335 | 137  | 59 | 0.925                      | 0.925 |
| <b>D71b</b> | 1696           | 335 | 144  | 57 | 0.969                      | 0.937 |

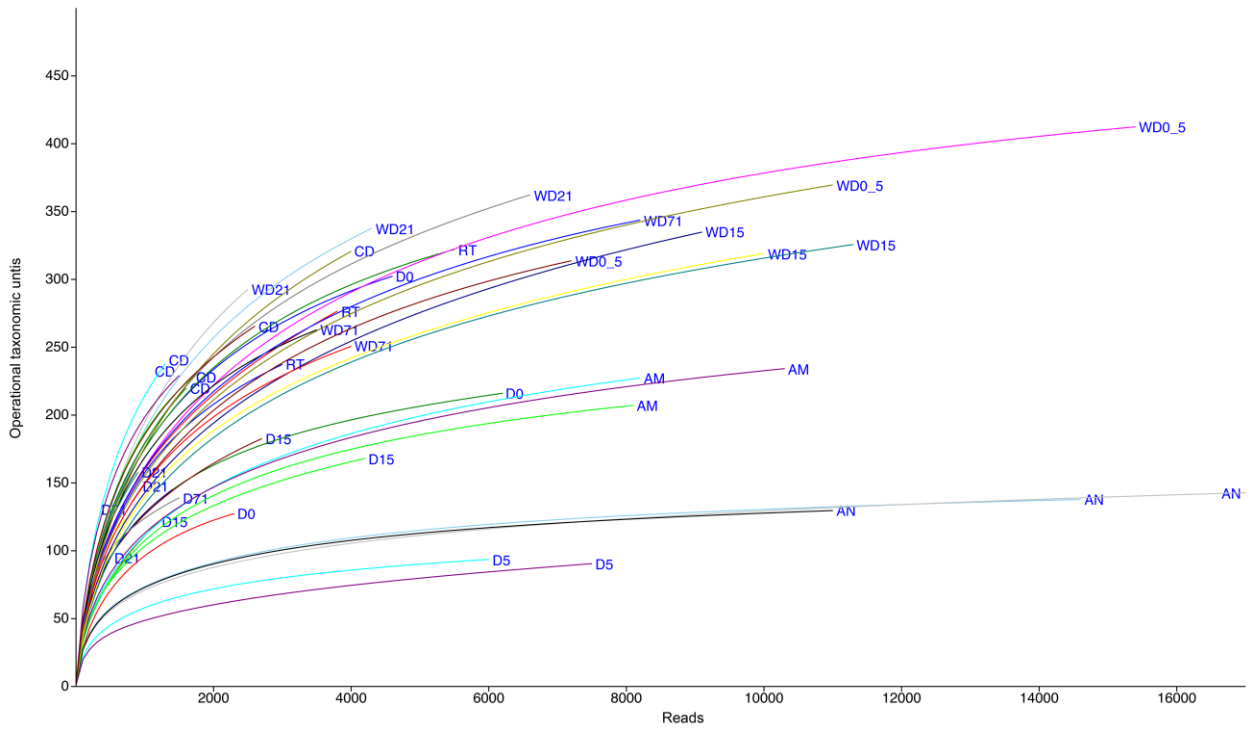

**Figure S1.** Rarefaction curves of the sequencing reads in all individual samples. Numbers indicate replicates. WD: Water sample on day X, D: days post hatching, CD: commercial diet, RT: rotifers, AN: Artemia nauplii, AM: Artemia metanauplii. Numbers indicate days post hatching

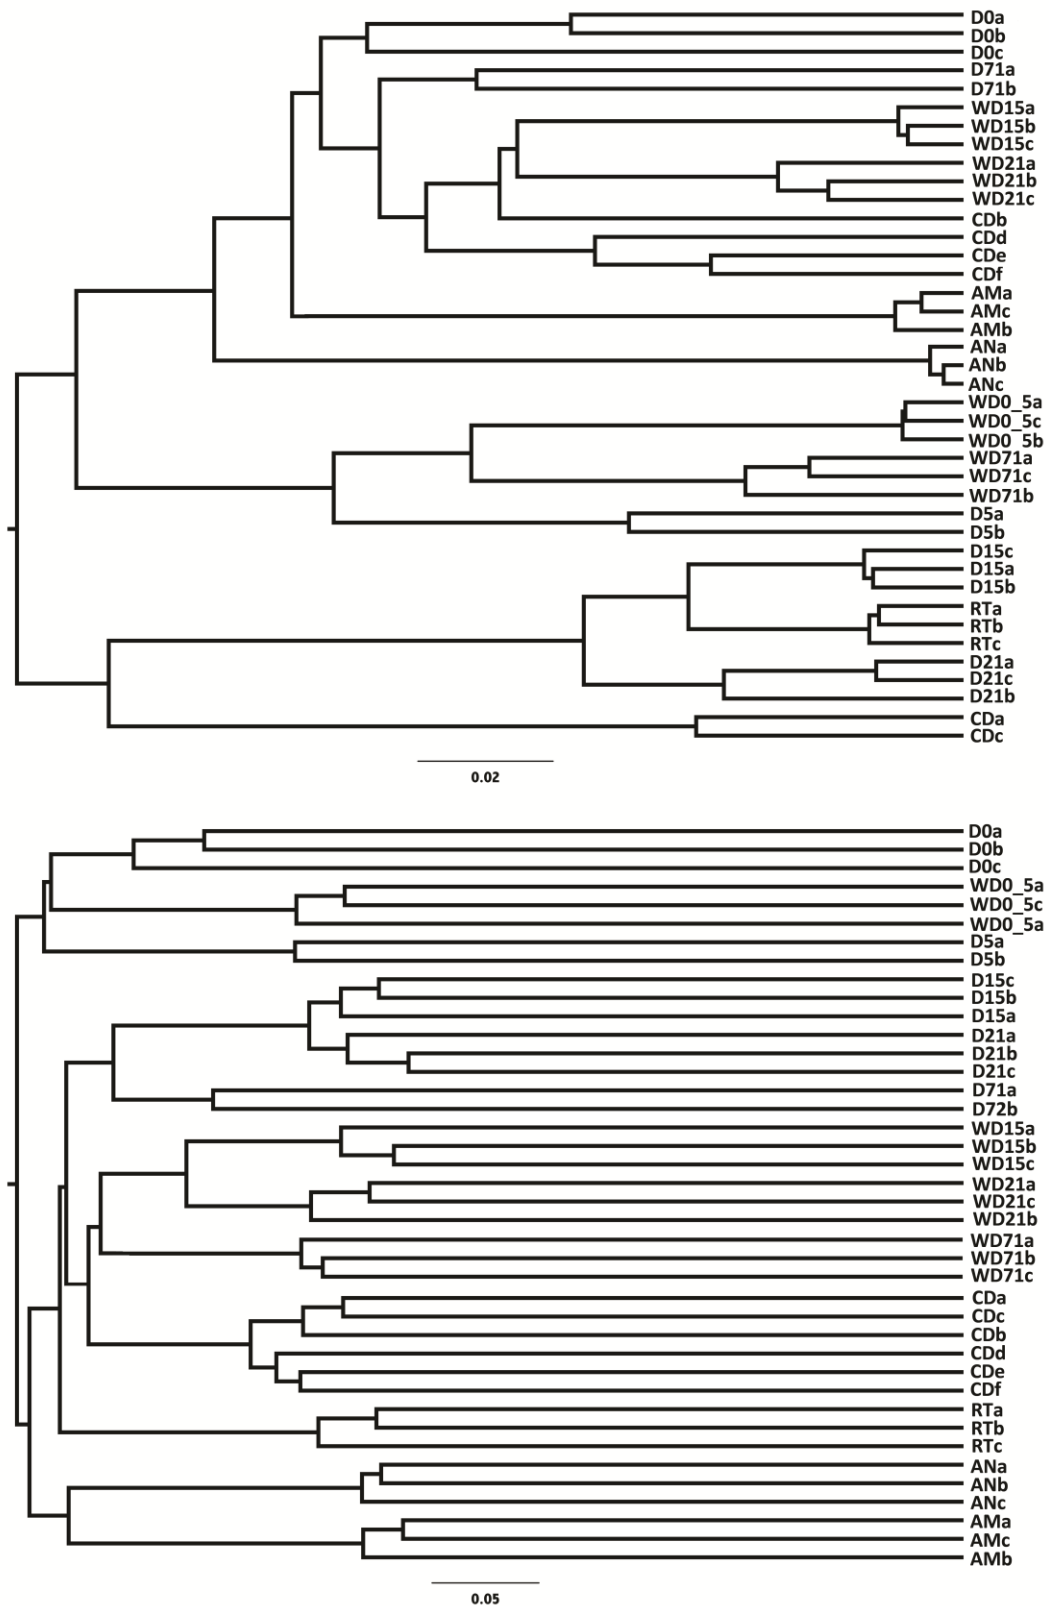

**Figure S2.** Clustering of bacterial communities at the operational taxonomic units level *Sparus aurata* larvae and the surrounding environment microbial populations. UPGMA clustering was performed on weighted (top) and unweighted (bottom) UNIFRAC measures between samples based on phylogenetic and OTU distribution distance matrices.

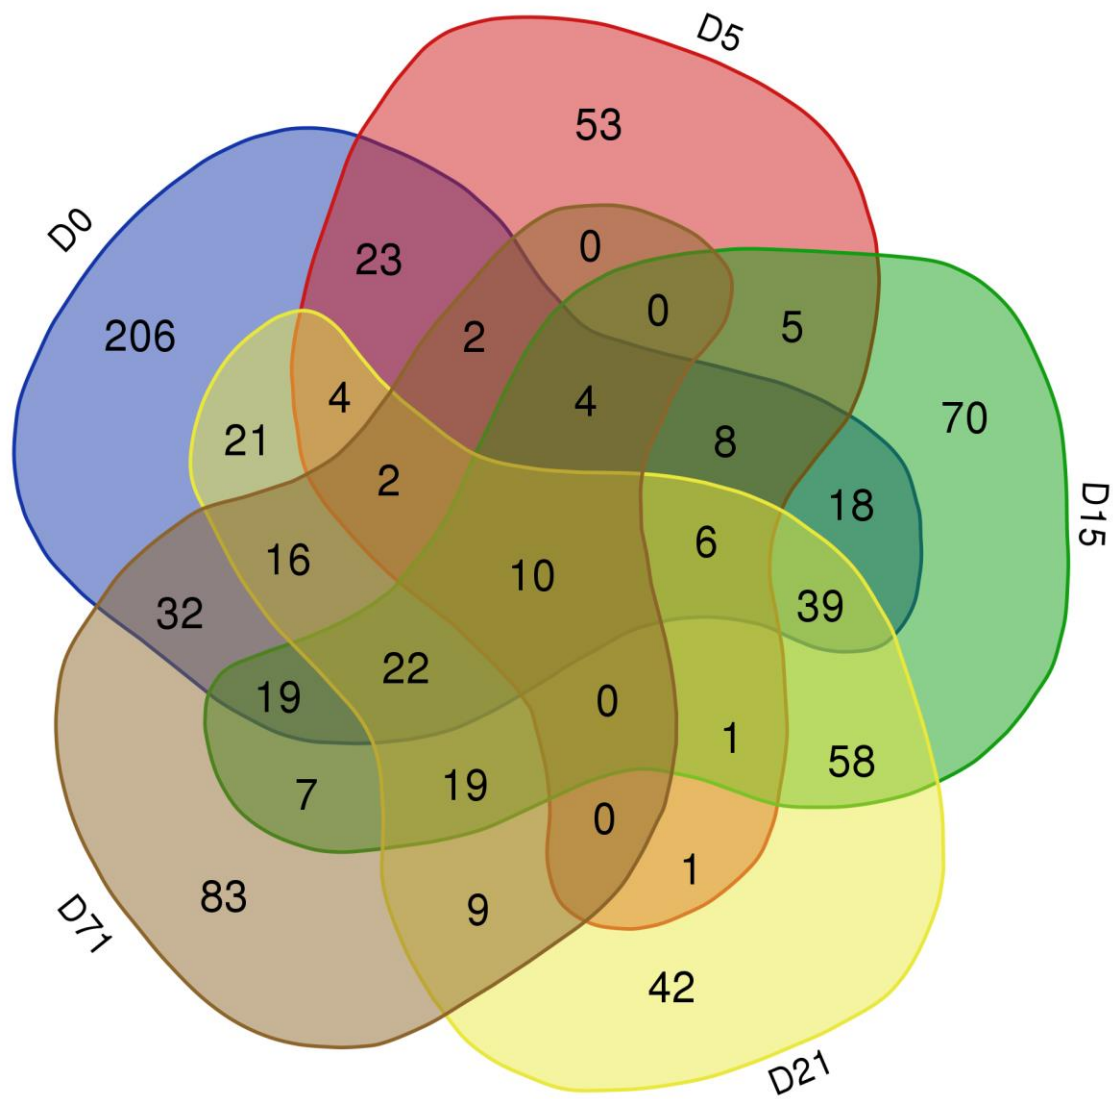

**Figure S3.** Venn diagram of the shared operational taxonomic units between all the investigated developmental stages of *Sparus aurata* larvae.

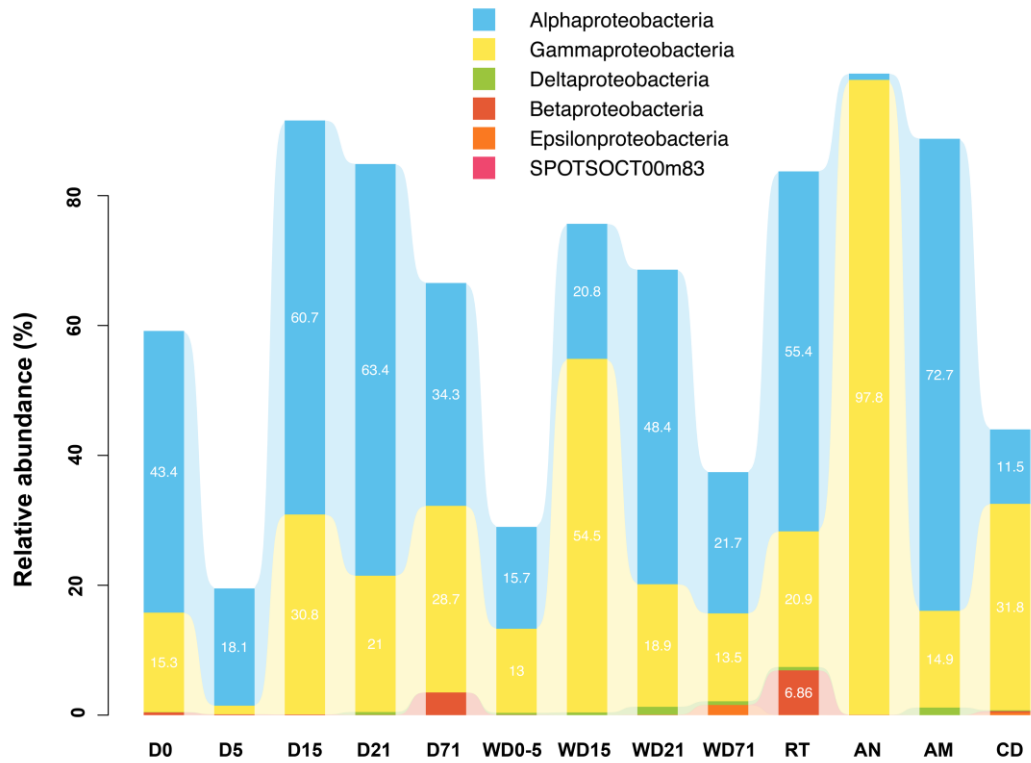

**Figure S4.** Mean relative abundance of proteobacterial classes in all sample categories (*Sparus aurata* larvae, rearing water and feeds) D: day, AM: *Artemia salina* metanauplii, AN: *Artemia salina* nauplii, CD: commercial diet, RT: rotifers, W: water sample.

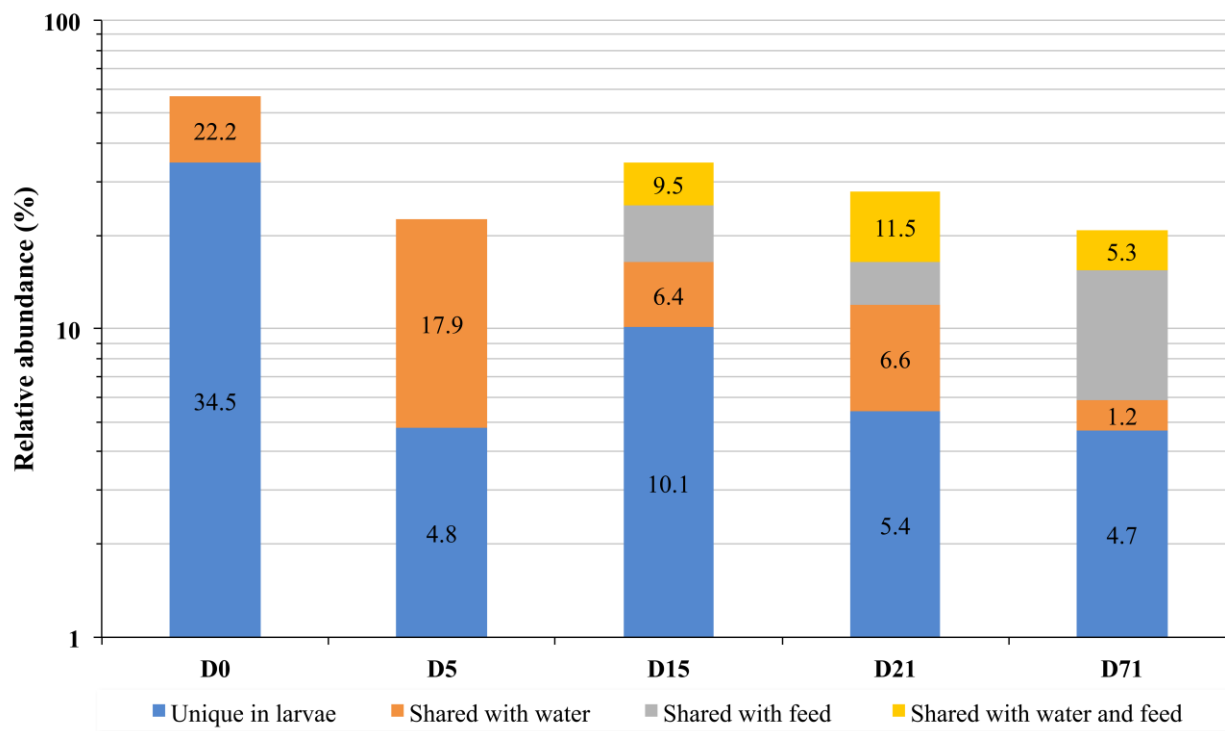

**Figure S5.** Percentage of shared operational taxonomic units between *Sparus aurata* larvae and the surrounding environment microbial populations. The percentage of unique OTUs in the water and feed is not shown.
